# Supplementary material for: Atmospheric highs drive asymmetric sea ice drift during lead opening from Point Barrow
Source: Copernicus journal article supplement (doi:10.5194/tc-17-3229-2023), 2023-08-09
Supplement: Supplementary file 1 [file tc-17-3229-2023-supplement.zip]

Archive with 3 entries (3 files):
- PB_leads_meta.csv
- README.txt
- tc-17-3229-2023-supplement-title-page.pdf
