# Supplementary material for: Atmospheric highs drive asymmetric sea ice drift during lead opening from Point Barrow
Source: Copernicus journal article supplement (doi:10.5194/tc-17-3229-2023), 2023-08-09
Supplement: Supplementary file 1 [file tc-17-3229-2023-supplement.zip › PB_leads_meta.csv]

date	longitude	latitude	wind_direction	sequence_ensemble	northerly_ensemble	southerly_ensemble	easterly_ensemble	westerly_ensemble
2000-03-02 23:15:00	[203.2692204878519, 203.3723940802808, 203.48808846608048, 203.61681616102123, 203.74586877050385, 203.86701180124484, 203.9781905832016, 204.083264687088, 204.2000934293666, 204.3205876518564, 204.4369487828465, 204.5583418639116, 204.6868773946377, 204.82034105720177, 204.9531240721921, 205.0827978186942, 205.21270198286916, 205.3492019559589, 205.48663263507555, 205.62299727071309, 205.7636598…	[71.39112068112185, 71.42181644733904, 71.44830884582412, 71.46825889119614, 71.48606321729476, 71.50735236786005, 71.53496934195819, 71.56410519911202, 71.58933998092479, 71.61292641070798, 71.63735877180903, 71.66176258097113, 71.68055544304038, 71.69514582804334, 71.7107175540987, 71.72909061359472, 71.74794965894876, 71.76301513798013, 71.77708647002389, 71.79046978377363, 71.79863912087728, …	easterly	1.0	0.0	0.0	1.0	0.0
2000-03-06 06:15:00	[203.2753458077423, 203.37973750978568, 203.49710147021585, 203.62536345325373, 203.75575157410216, 203.87617468592308, 203.9897608201492, 204.0973860078288, 204.21529668008608, 204.33694690138552, 204.45536569852987, 204.58264338214855, 204.71399530775932, 204.84479632835385, 204.97777102026305, 205.10922487232875, 205.2433668807265, 205.3750823975156, 205.50773420996424, 205.63832613667077, 205…	[71.38891306415792, 71.41858422214459, 71.44317410429744, 71.46150810061673, 71.4804914232699, 71.50483327906339, 71.53260463685953, 71.56137111506585, 71.5862930886284, 71.61099279503331, 71.6352739896052, 71.6561043321268, 71.67524956878071, 71.69219369387528, 71.70693383626723, 71.721657982822, 71.73836045355968, 71.7552300675837, 71.77173316034927, 71.78883345602061, 71.80711051542308, 71.825…	easterly	0.0	0.0	0.0	1.0	0.0
2000-03-06 22:50:00	[203.08791554476363, 203.18119443140108, 203.2747154889875, 203.3820667774843, 203.49756431635305, 203.61700321529352, 203.73276067981556, 203.84370974791307, 203.9557474635795, 204.07892153451772, 204.2124255350168, 204.34450791094355, 204.4777480965685, 204.61061800163336, 204.7406988995209, 204.87019267574925, 205.0047778714525, 205.1414144616408, 205.27961186511675, 205.41704436247332, 205.55…	[71.34297948964623, 71.37605396989925, 71.4098590478748, 71.43843078330553, 71.46348569900766, 71.48777131141969, 71.51422028756306, 71.54186981084005, 71.56795488022328, 71.58939633366656, 71.60621849573029, 71.62217887556133, 71.63823978365204, 71.65457921278629, 71.6735297677947, 71.69173940922121, 71.70627584860685, 71.71787550309415, 71.72926933579802, 71.74171732986765, 71.75265154807865, 7…	easterly	0.0	0.0	0.0	0.0	0.0
2000-03-07 05:20:00	[203.08382850528412, 203.18675929165207, 203.2854699646601, 203.38065348693465, 203.50170476907925, 203.6368338480555, 203.7738541275, 203.91077817383152, 204.0500897298335, 204.1903948048777, 204.3271018725396, 204.46101314144525, 204.5947218342504, 204.7294664513419, 204.8617166153047, 204.9965572678481, 205.1312166380308, 205.26772575312825, 205.4051683142425, 205.5397038400528, 205.6777938696…	[71.34783827746742, 71.37737510056603, 71.41032167951319, 71.4428832847985, 71.46455621693437, 71.47734949652732, 71.48768059883604, 71.49695551700304, 71.50487472527831, 71.51283081796674, 71.52420986890783, 71.53841142990561, 71.5528586988693, 71.56801388275733, 71.58392422331475, 71.59984241665929, 71.61489509948069, 71.6283407888688, 71.64023304754683, 71.65298365801578, 71.66705877229752, 71…	easterly	0.0	0.0	0.0	1.0	0.0
2000-03-30 22:05:00	[203.4178529362385, 203.54244968340277, 203.6623409213932, 203.77558321840664, 203.8870245208124, 204.0114611345523, 204.14064037312752, 204.27706229400724, 204.41180189983467, 204.54594344488103, 204.6839942864014, 204.8267114323248, 204.97086757297004, 205.1127094010941, 205.2519844655532, 205.3945775091523, 205.5374408348625, 205.6774440622468, 205.8196703826724, 205.9631622735114, 206.1058290…	[71.48258630015538, 71.5032288389013, 71.5265896320914, 71.55374837698233, 71.58217284056316, 71.60421261863362, 71.62349757858458, 71.63624068626176, 71.65115819192928, 71.66493074627326, 71.67213946351585, 71.67245707814685, 71.66909511667274, 71.66810989929527, 71.67054338471611, 71.67253548863938, 71.67207269609553, 71.66953778194404, 71.66636481418783, 71.66417898749948, 71.66323319106132, 7…	easterly	1.0	0.0	0.0	1.0	0.0
2000-04-03 23:15:00	[203.37286515011976, 203.45960054433027, 203.56014871014492, 203.66427478985204, 203.7850706841164, 203.90673080650672, 204.03038769759527, 204.15987844175487, 204.2914171736363, 204.4195935284996, 204.5434109895321, 204.6706454783583, 204.79579984502567, 204.91835590315216, 205.0417041603336, 205.16977762957976, 205.3018992639238, 205.42904634387403, 205.5434241405347, 205.65487310857424, 205.75…	[71.43932035212289, 71.47396567650833, 71.50452453084047, 71.5348445831605, 71.5570731326838, 71.58065570378417, 71.60238095357481, 71.62116931881869, 71.63943794057052, 71.6583601570974, 71.67950429046302, 71.7004345466068, 71.72158239456212, 71.74566879334766, 71.7688717463238, 71.78652317074526, 71.80219992147757, 71.82243218383024, 71.84800814093761, 71.87733414088689, 71.90950789910164, 71.9…	northerly	0.0	1.0	0.0	0.0	0.0
2000-04-04 22:20:00	[203.2485471219252, 203.32687930017545, 203.41609944563328, 203.53052631417776, 203.64577958203387, 203.76490950140777, 203.8733239869391, 203.94061374964724, 204.0387956328068, 204.17645120953893, 204.31204112222613, 204.4337566748552, 204.57335032690085, 204.71277301760205, 204.8514862470898, 204.9910966802788, 205.13705625627253, 205.2797474951985, 205.42440906954843, 205.56643006816643, 205.7…	[71.4038769244405, 71.44198329793545, 71.4761599993841, 71.50299076560694, 71.52774902519154, 71.55136675036836, 71.57999240921326, 71.61974650097517, 71.65069125856282, 71.6617491376977, 71.67453946552769, 71.69592963802992, 71.6985540286701, 71.68710658460347, 71.67587180118068, 71.66849190085621, 71.66603274650595, 71.66704634425354, 71.66921075286713, 71.67234448746696, 71.67647075761023, 71.…	easterly	0.0	0.0	0.0	1.0	0.0
2000-04-10 21:45:00	[203.12756654841127, 203.2049188356532, 203.2720465760828, 203.34236366052656, 203.43968364505756, 203.56311000569957, 203.6860942292842, 203.81051115844951, 203.92791078885256, 204.05363639061707, 204.1838295855588, 204.3192635276111, 204.45959448980523, 204.6034043390084, 204.74430260943817, 204.8844687075373, 205.0244623813836, 205.16516527038712, 205.30629520925712, 205.4478341647323, 205.589…	[71.3539485030147, 71.39159700934194, 71.43095411058117, 71.46996848551477, 71.50097620557437, 71.52362487793712, 71.54450704514983, 71.56824916781754, 71.594095541179, 71.6145771230293, 71.63154482722086, 71.64487946260729, 71.65471178102594, 71.66111169551952, 71.66580250904097, 71.67060336193367, 71.67502828898284, 71.67836555743692, 71.67993815064546, 71.67960006610201, 71.68018606407912, 71.…	southerly	1.0	0.0	1.0	0.0	0.0
2000-04-11 05:50:00	[202.9232553970158, 203.018949149071, 203.117945721705, 203.22994510950943, 203.34818102079376, 203.46807064651068, 203.5919623513252, 203.72377755746345, 203.8615305061399, 204.0016617363051, 204.1407004044144, 204.28062850399112, 204.4220943127264, 204.56203942968264, 204.70129323329624, 204.84038287217007, 204.97897005636315, 205.1171978004438, 205.254333654176, 205.39099907239884, 205.5272313…	[71.302773461414, 71.33591989149201, 71.36692757217936, 71.39439752771182, 71.4186027496541, 71.4423821348857, 71.46363005555538, 71.47922311092717, 71.4870687536735, 71.49271994954059, 71.49961993507513, 71.50586344089098, 71.51076474446327, 71.51666737539092, 71.52429362084891, 71.53268822765989, 71.54173993194583, 71.55171227546752, 71.5624930413154, 71.57434420006908, 71.58634684262151, 71.59…	southerly	0.0	0.0	1.0	0.0	0.0
2001-01-07 21:40:00	[203.16031197757584, 203.2703488561399, 203.3758680065269, 203.487690977563, 203.6156554620338, 203.74163029431492, 203.865095397881, 203.9961475255109, 204.13574527376295, 204.2738576873811, 204.41127784651107, 204.5527568960747, 204.6953144032814, 204.83755589271792, 204.9795271422701, 205.11901193514524, 205.2572073860555, 205.3952066107118, 205.5344424167638, 205.6751490525429, 205.8155763753…	[71.37201414815732, 71.39957816604678, 71.42958504141806, 71.45672514169077, 71.47751429742294, 71.49664597527548, 71.51795822118501, 71.53331143435446, 71.54093608274935, 71.54894295730506, 71.55843825007449, 71.56380154139907, 71.56407935870209, 71.56093119085871, 71.55728769511006, 71.55607377711691, 71.55862055721991, 71.56470932719773, 71.57273817557031, 71.58036337209931, 71.58608064838928,…	easterly	1.0	0.0	0.0	1.0	0.0
2001-02-23 22:35:00	[203.2690979624043, 203.39019892912276, 203.5106576419797, 203.63335804902093, 203.7557037003711, 203.87598852654625, 204.0177873359885, 204.1451333651125, 204.2654792620752, 204.3849970128976, 204.5018737559837, 204.6189124297488, 204.7460608651791, 204.8807098754524, 205.0113460387763, 205.13538561792143, 205.25377041664552, 205.3648262902232, 205.47936609143525, 205.60088464183437, 205.7168122…	[71.41431549125646, 71.4376491827121, 71.46059816522946, 71.4827084364583, 71.5049291965484, 71.52849824163316, 71.53086306275306, 71.55008506441729, 71.57263161558114, 71.59671497764042, 71.62144105652075, 71.64530871711978, 71.66633232346952, 71.68196596803521, 71.69854227481736, 71.7201300231694, 71.74499547298774, 71.77299600173349, 71.79920275572724, 71.82409017639242, 71.8511420678054, 71.8…	easterly	1.0	0.0	0.0	1.0	0.0
2001-02-24 21:40:00	[203.1467654666077, 203.24036162141329, 203.3428175555149, 203.46079074264173, 203.58776729774183, 203.7116855808001, 203.8225224993301, 203.9259520106609, 204.0597654202977, 204.20170257854045, 204.34287664251403, 204.47991713127865, 204.61585855353232, 204.75420787175952, 204.8949765420722, 205.03605821932047, 205.17522895923145, 205.3125602250633, 205.4480574436868, 205.5828268169714, 205.7179…	[71.35947837329768, 71.39288134695991, 71.42310420946538, 71.44719266740258, 71.46754205115383, 71.48888364923965, 71.5156663752058, 71.5455921222263, 71.56048042952372, 71.5659191738666, 71.56474445036325, 71.55458887878959, 71.54189382630994, 71.53260952324675, 71.52971915913531, 71.53293896342834, 71.54042245664064, 71.5508891777795, 71.56361243696874, 71.57758787577711, 71.59114915787966, 71.…	easterly	0.0	0.0	0.0	1.0	0.0
2001-03-20 05:55:00	[203.2210824062397, 203.3284419707944, 203.44721981260585, 203.57472570109115, 203.70865954940604, 203.84837106834465, 203.9866767530064, 204.1270191076532, 204.26609651934996, 204.4026362942758, 204.5359940917974, 204.66767247787556, 204.7969392880273, 204.9307519198347, 205.07047607893247, 205.2121585486999, 205.35180436252205, 205.4897606609713, 205.62941000957875, 205.7702389270976, 205.91164…	[71.3922799346008, 71.42100827591497, 71.44579116351413, 71.4636165918047, 71.47588916041556, 71.48510534005106, 71.49229348640232, 71.49879381900477, 71.50627166223416, 71.51648164157847, 71.53051025103899, 71.54807894134115, 71.56618229150067, 71.58090665771455, 71.58814149672999, 71.58674277383466, 71.57894349046605, 71.5687062747829, 71.56073741935319, 71.55714433176897, 71.55709882798892, 71…	southerly	1.0	0.0	1.0	0.0	0.0
2001-04-27 21:50:00	[203.35614843056987, 203.48424653629556, 203.61176976527108, 203.73420592210897, 203.85367095919815, 203.96885645961507, 204.0846613283447, 204.21126026356643, 204.34547279732303, 204.47518289281825, 204.6077845759633, 204.73925005078632, 204.87423118409828, 205.01238861125177, 205.15043678820172, 205.2868080851749, 205.4198280682388, 205.5506079696675, 205.68132982381985, 205.80948404372063, 205…	[71.4430409031056, 71.46144156975554, 71.48171773975085, 71.50456681102644, 71.53011413543464, 71.55587986440075, 71.5814588498369, 71.59998902410823, 71.61431351597244, 71.63111773846647, 71.64769391791576, 71.66283485813088, 71.6759876366404, 71.68680495686542, 71.69739962607983, 71.71050768199412, 71.72690192974207, 71.74597988967724, 71.76558424389829, 71.78399742547607, 71.80285555239728, 71…	northerly	1.0	1.0	0.0	0.0	0.0
2002-01-20 22:10:00	[203.24575957529032, 203.32157839207372, 203.41913007991505, 203.5586664426935, 203.69595508056395, 203.83297255711537, 203.9765779658511, 204.1166919690139, 204.2569569102685, 204.39626842253787, 204.5326236448604, 204.65794770877665, 204.76239011124173, 204.8946760318992, 205.02844032291435, 205.16698977215088, 205.30271382559792, 205.4285998738935, 205.55170740125897, 205.66271134106395, 205.7…	[71.40044709079905, 71.43826345952692, 71.46958725230857, 71.48065961365187, 71.48901895806135, 71.4958335412642, 71.49601989150797, 71.49449041463527, 71.49424896746797, 71.4982433286518, 71.50788751315663, 71.52896425992374, 71.55714857321001, 71.57512238293816, 71.5887183552601, 71.60121800011427, 71.61596329888923, 71.6347848180415, 71.65605719139049, 71.68378455687542, 71.71641661025318, 71.…	easterly	1.0	0.0	0.0	1.0	0.0
2002-02-01 22:35:00	[203.0770142093448, 203.1663676352627, 203.2641325875693, 203.36826772316996, 203.4837091007191, 203.60390914391104, 203.7344551377732, 203.8682437892101, 204.0039890376933, 204.1398532213125, 204.27086195890888, 204.38106265961457, 204.44904977007596, 204.49491190211376, 204.53220289242643, 204.5689441559564, 204.59736476628268, 204.61480912539471, 204.6208435873097, 204.6008929297584, 204.56821…	[71.32717087539918, 71.36134134179977, 71.3939818880774, 71.42261898143983, 71.44945613241455, 71.47313407758774, 71.4896875947973, 71.50385379107487, 71.5162886582176, 71.52764321072931, 71.54512446708557, 71.5730743777635, 71.61322714594421, 71.65634970485661, 71.69922431411804, 71.74233523835977, 71.78664793867502, 71.8324710365965, 71.87760535184492, 71.92220224031396, 71.96562790365725, 72.0…	northerly	1.0	1.0	0.0	0.0	0.0
2002-02-02 06:40:00	[203.11920927508103, 203.2192021054707, 203.3237061203808, 203.4278537810187, 203.5429032946493, 203.66749549433263, 203.79648413194136, 203.92698622910527, 204.05182511821948, 204.18241995250196, 204.30927536153723, 204.41599910705216, 204.52382086119647, 204.66547352897916, 204.80504372663304, 204.94506305027937, 205.07504058056344, 205.1829868798904, 205.28190995239916, 205.3743532050401, 205.…	[71.33960229232656, 71.3699066120297, 71.3993835969569, 71.4294588734498, 71.45499106265214, 71.4739359994069, 71.49064275179094, 71.50903269700241, 71.52869778818824, 71.54448050300476, 71.5637217521842, 71.59213650850214, 71.61459425245971, 71.62059070727135, 71.62540260923655, 71.63358638109588, 71.65188036357848, 71.68039508248, 71.7124334957567, 71.74593085343051, 71.7828138746363, 71.823157…	northerly	0.0	1.0	0.0	0.0	0.0
2002-02-02 21:40:00	[203.221143706136, 203.2996236393588, 203.42025970110973, 203.5486738544176, 203.66470184732063, 203.7616405826811, 203.87732543596397, 204.01868240645985, 204.1606821656616, 204.30199373924896, 204.43989898565584, 204.57638096159437, 204.7191129131766, 204.85608381987245, 204.99031429635207, 205.1246801037098, 205.25686429239693, 205.37924640259888, 205.4951658334086, 205.61355548618576, 205.734…	[71.42010981917548, 71.45786766195924, 71.47746181985035, 71.49680683671588, 71.52271545155412, 71.55557811552322, 71.56753093048663, 71.56499139238748, 71.56877009443608, 71.56605708910072, 71.5690475665911, 71.5803175027425, 71.58910261349578, 71.60037135723681, 71.61448076207031, 71.62894424508379, 71.64554132152688, 71.6687510682788, 71.69384876082422, 71.71948977113087, 71.7428837958866, 71.…	northerly	0.0	0.0	0.0	0.0	0.0
2002-02-03 22:20:00	[203.1031039633968, 203.22801141877292, 203.35598571291823, 203.48718425479197, 203.6203755586293, 203.75518219896043, 203.8841171286284, 204.02198959222235, 204.1561765097775, 204.28708676093717, 204.42150522420408, 204.5647957875653, 204.70641772827543, 204.8392127632104, 204.96813182878415, 205.0976804911407, 205.22866521202727, 205.3487057885237, 205.4690953304093, 205.59699667697384, 205.729…	[71.41384795264938, 71.43417945254834, 71.4524061437751, 71.46900208179173, 71.4842514724759, 71.50077492831137, 71.51775600773146, 71.53044075800267, 71.54472400839163, 71.56172716435127, 71.57413598080151, 71.58134139215655, 71.58616776063216, 71.60113089685285, 71.61932819808686, 71.63664361700992, 71.65516608495757, 71.67825959365912, 71.70100194631357, 71.72069348586865, 71.73882442856224, 7…	easterly	0.0	0.0	0.0	1.0	0.0
2002-02-04 06:30:00	[203.2545890424519, 203.38658646138344, 203.5092453115641, 203.63061570727004, 203.75398959154828, 203.88656543811075, 204.0274319799244, 204.1700448627064, 204.3081177875056, 204.4420891542919, 204.57636961214925, 204.71158404953687, 204.85115471769075, 204.9922238991361, 205.1344736317287, 205.27555722229533, 205.41186751847823, 205.54935459221207, 205.6875304638524, 205.8163874693148, 205.9458…	[71.42612508498289, 71.43982639553025, 71.46158493466694, 71.48266411695136, 71.50583162956251, 71.52253185393855, 71.52639984494876, 71.52369787160833, 71.51100747321047, 71.49677205662128, 71.48254767957698, 71.47053842474759, 71.46322657060057, 71.46322689636777, 71.46610084791736, 71.46959127148524, 71.48003117846419, 71.49163093972615, 71.50322154560249, 71.52089354196704, 71.5389137923375, …	easterly	0.0	0.0	0.0	1.0	0.0
2002-02-11 21:30:00	[203.5459295077636, 203.6718913000717, 203.7996377252017, 203.93423628219105, 204.0717054200278, 204.21062543820057, 204.3427099826017, 204.4654849677058, 204.5973098891832, 204.73468862370493, 204.8745500760242, 205.01216343518715, 205.15318053601692, 205.29465017678243, 205.43648604921847, 205.57830535724065, 205.71695193402337, 205.855576073689, 205.9830614824073, 206.1046905632029, 206.221837…	[71.48226962522071, 71.500216686985, 71.51884684606807, 71.53408049065665, 71.54657187591248, 71.5579780868065, 71.5732869666291, 71.59531783324931, 71.6139593633996, 71.62676219618085, 71.63430528688325, 71.64192448988945, 71.65270751246221, 71.66355379453677, 71.66891050049938, 71.67057949590767, 71.67373055443448, 71.68310842712702, 71.69891515527445, 71.71920526896301, 71.74238064211895, 71.7…	northerly	1.0	1.0	0.0	0.0	0.0
2002-02-14 05:25:00	[203.10105104122331, 203.24003127520885, 203.36409056267703, 203.47815872382856, 203.6073841787749, 203.74381891241944, 203.88022245539415, 204.01424937160027, 204.15016577207547, 204.28576327541865, 204.4169433050117, 204.51792716727465, 204.60435275645895, 204.7484791267284, 204.89035122401063, 205.03052922652944, 205.16959855472373, 205.306402059084, 205.44122770972004, 205.5758664204897, 205.…	[71.41482666033959, 71.42069735953517, 71.44040372808064, 71.46622964118606, 71.48498113628064, 71.49860072724798, 71.51300693709523, 71.52729246899906, 71.540130915378, 71.55420862828494, 71.57075252610395, 71.60128883168079, 71.6307604868743, 71.63393789286637, 71.63901433314336, 71.64577863818688, 71.65490731153444, 71.66700473726642, 71.68171164129666, 71.6972106452998, 71.71123491377023, 71.…	northerly	0.0	1.0	0.0	0.0	0.0
2002-02-15 22:45:00	[203.093636806529, 203.19302925877392, 203.29725663038928, 203.4054507408873, 203.51998243147384, 203.6452187692441, 203.7788129625813, 203.9150082823877, 204.04936282272817, 204.18081843889013, 204.3121339149764, 204.4420840100855, 204.56751451794017, 204.69369471043785, 204.82268962355224, 204.95598058509628, 205.09130243759995, 205.2268979155506, 205.36390872764437, 205.50115706400115, 205.639…	[71.35551716484248, 71.3854778842471, 71.41441462490386, 71.44228347152503, 71.46923236044597, 71.49212521559235, 71.50947554526127, 71.52300435448251, 71.5351129514309, 71.54769754947516, 71.56345236445725, 71.58304110752402, 71.60438688313985, 71.62588458491291, 71.64406407292181, 71.65912254535941, 71.6738615774965, 71.68895742294274, 71.70342665057228, 71.71629826035674, 71.72780061090724, 71…	easterly	0.0	0.0	0.0	1.0	0.0
2002-02-24 06:05:00	[203.45795299392884, 203.5940907284455, 203.7211334300429, 203.8335819569179, 203.9353933953064, 204.04717352833563, 204.17663377878543, 204.3169136945004, 204.4580133261965, 204.59795228858175, 204.74034676539043, 204.8812897404736, 205.0234530732837, 205.16115663083963, 205.30050167975, 205.44162359823156, 205.58241674893537, 205.72369716260383, 205.8644106865604, 206.0057143005104, 206.1470873…	[71.45839935368471, 71.4708628074949, 71.48971236225202, 71.518538458432, 71.55029808948171, 71.57897265874756, 71.59927971980721, 71.60665189655731, 71.6038109112809, 71.59703732127045, 71.59062280142189, 71.5875248599828, 71.59007350341899, 71.59879911089305, 71.60873314361895, 71.6148525230783, 71.61650139457818, 71.61462167785976, 71.61043826971833, 71.60534141879306, 71.60065540435431, 71.59…	easterly	1.0	0.0	0.0	1.0	0.0
2002-02-24 22:40:00	[203.23207626309457, 203.3468189205972, 203.46761942253303, 203.5911059796369, 203.72203276070923, 203.8594233684528, 204.00078455502205, 204.1433534263904, 204.2764014160533, 204.41031019292905, 204.5331079972562, 204.6393757418914, 204.74930831222423, 204.8699329275572, 204.9980665537609, 205.132183861765, 205.27368114768387, 205.4132130920736, 205.5491557150052, 205.68269867061997, 205.8205922…	[71.40448093052535, 71.42962429283766, 71.45311719459238, 71.47385959151192, 71.48896728665373, 71.49656186807034, 71.50007559718539, 71.50733940588661, 71.52163391854923, 71.52944508335831, 71.5086124424393, 71.47941756429947, 71.45196459092779, 71.42869258951158, 71.41066934525006, 71.3975567458021, 71.39058821978459, 71.39196808865614, 71.39977249178484, 71.41049506859956, 71.4216904264201, 71…	easterly	0.0	0.0	0.0	0.0	0.0
2002-03-14 22:25:00	[203.2958251398532, 203.41567272557447, 203.53905100703236, 203.6720435020069, 203.80295518042595, 203.9366629601805, 204.076898410418, 204.21026848556437, 204.34112226858983, 204.47575633317444, 204.61586157108647, 204.75365932317783, 204.88371152276653, 204.9978105855193, 205.12056471470729, 205.2509128025955, 205.37626084767905, 205.50227892218004, 205.62308103114484, 205.7353622692073, 205.81…	[71.4175240098308, 71.44155940083425, 71.4625673478103, 71.47929370404367, 71.49452171544634, 71.50708073031927, 71.51553832449459, 71.5269860824831, 71.5441897868431, 71.5575561337934, 71.56362190157333, 71.57256706522298, 71.59001950063217, 71.61560528782383, 71.63813713771113, 71.65632862201102, 71.6777264239125, 71.69948757898587, 71.72262696250891, 71.75017448573368, 71.78507126187232, 71.81…	easterly	1.0	0.0	0.0	1.0	0.0
2003-01-29 06:35:00	[203.352458423609, 203.48778692649864, 203.6196040816089, 203.7563848164632, 203.89461607175693, 204.02332799219204, 204.10980922016392, 204.1839373229292, 204.2615283070685, 204.3495331013956, 204.44444282993825, 204.54231251901595, 204.63714499338576, 204.72273445762536, 204.80597491844105, 204.89759838773725, 205.0079700077901, 205.1231465269538, 205.2389281665477, 205.35329918399407, 205.4717…	[71.44558259280784, 71.45907866983188, 71.47321265539513, 71.48703723413827, 71.49642055706963, 71.51512676014278, 71.55008977567078, 71.58788563626024, 71.6241845165259, 71.65966912805054, 71.69388340306163, 71.72694199369039, 71.76131527774751, 71.79625137332891, 71.83347234562567, 71.86794999537356, 71.8964230730189, 71.92223388503386, 71.94877077530788, 71.97537881189744, 72.00157447830054, 7…	northerly	1.0	1.0	0.0	0.0	0.0
2003-01-29 21:30:00	[203.22061280132849, 203.3310690782063, 203.44810896165987, 203.56504809226604, 203.6885214729515, 203.8125129852716, 203.94227778890576, 204.0792691300559, 204.2183068693309, 204.35260483121596, 204.48481764673377, 204.6100845020877, 204.74222788452911, 204.87504820762248, 205.0104582149396, 205.15279813115404, 205.2968448082221, 205.43636518119268, 205.581192516621, 205.7196036540288, 205.85982…	[71.417718056744, 71.44339678770665, 71.4691496779404, 71.49319932677255, 71.51574544164112, 71.53459067187787, 71.5504098246646, 71.56334273483645, 71.57431063496622, 71.58679827472523, 71.60457540072993, 71.62521783287306, 71.64335785235315, 71.65830080847881, 71.66950340396818, 71.67514012488724, 71.67641603668778, 71.67637987880335, 71.67732251744974, 71.68045049514997, 71.68655546858703, 71.…	easterly	0.0	0.0	0.0	1.0	0.0
2003-01-30 05:40:00	[203.1345892115501, 203.2519697071776, 203.37081797274865, 203.4959393200756, 203.63159869904743, 203.76468004382485, 203.89875008674176, 204.03102973500543, 204.1659599955321, 204.29927831315428, 204.43667471612204, 204.58002123205785, 204.71752105052897, 204.85392873289112, 204.9871865176042, 205.1197173238768, 205.2541629674441, 205.3922675802985, 205.5322115086721, 205.6723184387802, 205.8126…	[71.38596195336454, 71.41356690009188, 71.43986355692401, 71.46050697206, 71.47538809685753, 71.48873337955916, 71.5044387385074, 71.52042471283396, 71.53568795575914, 71.54965401638061, 71.5596645431759, 71.56257715128623, 71.55639389166917, 71.5437494807389, 71.52841486788512, 71.51290102288041, 71.4999099914115, 71.49064060891362, 71.48430310295362, 71.47953056203022, 71.47486689298118, 71.469…	easterly	0.0	0.0	0.0	1.0	0.0
2003-02-19 14:00:00	[203.36322771498757, 203.4762879842383, 203.5996205337385, 203.72699309176107, 203.8554666304597, 203.98468469943447, 204.11529511902265, 204.2462517868407, 204.3770220267924, 204.50639238211, 204.6342869790347, 204.7593145813948, 204.88311368572565, 205.01135651995284, 205.14741535491183, 205.2799938367233, 205.4165404699974, 205.5508021232148, 205.6885237696813, 205.82383408129328, 205.95790611…	[71.41997360171794, 71.44737244221399, 71.46779321843948, 71.48677417223593, 71.50494114804016, 71.52298668943027, 71.54053146349513, 71.55769817177408, 71.57520555505586, 71.59327652745785, 71.61313318437611, 71.6354092366212, 71.65782398578122, 71.67818513437112, 71.69480640054616, 71.71019173233297, 71.72552578541756, 71.7395459782851, 71.75334260672933, 71.76774771032048, 71.78492234931889, 7…	easterly	1.0	0.0	0.0	1.0	0.0
2003-03-15 13:10:00	[203.42096937551895, 203.5483469328795, 203.66969543976973, 203.7658069062508, 203.8553968096662, 203.92440407747875, 203.946896267726, 203.9647379749362, 204.00016028581425, 203.9874186231748, 203.9703561986198, 203.9522279514119, 203.9318789509472, 203.9389081115121, 203.935877199949, 203.88884665909785, 203.8087268458024, 203.71110748295297, 203.61763437637453, 203.56222294658076, 203.52894369…	[71.44451116931474, 71.46415989485988, 71.4867396635923, 71.51936514191578, 71.55574537046739, 71.5958363648085, 71.64016319911383, 71.68394978654419, 71.72821641521637, 71.7723480067232, 71.8175745297687, 71.86197808107998, 71.9065766533412, 71.95123568910905, 71.99608244140933, 72.03810581638695, 72.07521853970249, 72.10915176031584, 72.14344536714488, 72.18439715723056, 72.22731744529636, 72.2…	northerly	1.0	1.0	0.0	0.0	0.0
2003-03-15 22:35:00	[203.30818008630928, 203.4099097878645, 203.52080556115584, 203.6339593659772, 203.73614146097336, 203.834663956853, 203.9528805592753, 204.07870331833385, 204.196265980322, 204.3026213885162, 204.3983349956754, 204.49783916912668, 204.59396482572, 204.6837709455052, 204.7764382518669, 204.83318677503505, 204.86165274374733, 204.91062197691645, 204.95879188810585, 204.99798741993155, 205.04289620…	[71.40138699753645, 71.43205928663502, 71.46030887620967, 71.48812797201174, 71.51936110669351, 71.55192870992101, 71.57471699042831, 71.59528829187677, 71.61996117753976, 71.64969349393067, 71.68257032232503, 71.71558689089547, 71.74956638286704, 71.78372242825031, 71.81934480197012, 71.8601550351254, 71.90434712675886, 71.94700356923539, 71.98898532812632, 72.03230304631401, 72.07474429567586, …	easterly	0.0	0.0	0.0	1.0	0.0
2003-03-21 22:00:00	[203.40520165680363, 203.5052287861555, 203.6156319018607, 203.73906990602063, 203.8686122649732, 204.00158231295123, 204.13339740062676, 204.2574089528556, 204.3800187993688, 204.4913835442333, 204.58740628299265, 204.67058664161357, 204.74851477588845, 204.83224190287925, 204.93235808485636, 205.04370021182933, 205.15376953422816, 205.26378545712225, 205.37315025100827, 205.47681252296067, 205.…	[71.4370634490687, 71.46839999190715, 71.49711548128431, 71.51933054180884, 71.53597787527121, 71.55154005216468, 71.5688081102771, 71.58815401506773, 71.61145124534718, 71.63948665138952, 71.6719557989795, 71.70843873050974, 71.74633209954507, 71.7826593340466, 71.81431281583349, 71.84369179443857, 71.87265938171777, 71.9027057589251, 71.93341364580277, 71.96435509878783, 71.99635448150023, 72.0…	easterly	1.0	0.0	0.0	1.0	0.0
2004-01-19 22:00:00	[203.2305259532241, 203.34875522902988, 203.454019042695, 203.566011597703, 203.68817067116515, 203.81984301936103, 203.9546223366765, 204.0873351606817, 204.2258935769317, 204.3673538583718, 204.5052180133404, 204.6468475935293, 204.79146396002213, 204.93603072624092, 205.0793172675571, 205.2209873131061, 205.3614262513731, 205.4989577740232, 205.63798963350504, 205.7790174148092, 205.9195897546…	[71.38642462840801, 71.41093049559927, 71.44115097870754, 71.46861712292711, 71.49086591391689, 71.5080284090024, 71.52104703209112, 71.5346383337789, 71.54068833664039, 71.53861357167887, 71.53525196414498, 71.53149916612135, 71.52622971398134, 71.52345593764903, 71.52423295559818, 71.52619843685086, 71.52779137768373, 71.52922939302313, 71.53097442704332, 71.53487941980296, 71.54320884311154, 7…	northerly	1.0	1.0	0.0	0.0	0.0
2004-01-20 06:10:00	[203.3167576476589, 203.4088681275796, 203.52451293455815, 203.6499077986624, 203.77762094847796, 203.90759966088277, 204.04031522460303, 204.1812934887444, 204.31959325866717, 204.46201236078144, 204.59927789044517, 204.7404619935645, 204.88176145235923, 205.02323545329492, 205.16287849324272, 205.30320792729157, 205.4440566095313, 205.58342328322635, 205.72464916153928, 205.86547665983545, 206.…	[71.39779720209256, 71.43172250908887, 71.45837678972549, 71.47918265209009, 71.4983948717207, 71.51774588046585, 71.53278385864162, 71.5378207460893, 71.53614321974601, 71.53839888470054, 71.54731880893326, 71.55142728165386, 71.55121741447071, 71.5506795866005, 71.55156817048724, 71.55463534067879, 71.55986579504803, 71.56561617458274, 71.57071357213417, 71.57534991968012, 71.58020631638945, 71…	northerly	0.0	1.0	0.0	0.0	0.0
2004-01-24 22:20:00	[203.1287895538955, 203.24010087999392, 203.3493176188001, 203.4566351313185, 203.57806247085284, 203.71181306364213, 203.84760741246848, 203.9791214251368, 204.12121648690396, 204.2624056369241, 204.40589502641484, 204.54694531258767, 204.6785849513791, 204.8097149510361, 204.94225283180631, 205.06654676665937, 205.20157098154175, 205.3439586399166, 205.48797796340224, 205.6302820247001, 205.772…	[71.35833455193581, 71.38610729193056, 71.41500138653925, 71.44492367584083, 71.46686696791032, 71.48233050215921, 71.49545361011624, 71.51044847885802, 71.51340908307594, 71.51324063326416, 71.51327411875062, 71.51741246744703, 71.53111772702869, 71.54882020897531, 71.56401064657129, 71.58606832125982, 71.59899002696149, 71.60094255799433, 71.60160858919659, 71.60208249249479, 71.60172870220762,…	easterly	0.0	0.0	0.0	1.0	0.0
2004-02-01 21:30:00	[203.09545264442508, 203.21547060655715, 203.3307145490199, 203.4234117654185, 203.5101803687749, 203.5956701194656, 203.67092201355973, 203.73987144467756, 203.8207179882077, 203.92687274460587, 204.04355723183983, 204.13248674967383, 204.1861921662554, 204.24415174049585, 204.31135560952947, 204.3642863835973, 204.39051899030463, 204.40900122073955, 204.42683291004, 204.43615046299988, 204.4332…	[71.36759078318538, 71.39066059040886, 71.41674821115097, 71.4497313711812, 71.48436180917454, 71.52018283256331, 71.55804895176277, 71.5959534397224, 71.63151830591893, 71.66135427686068, 71.6877868417071, 71.72277173288727, 71.76385954501981, 71.80420400224443, 71.84479138435701, 71.88641718794901, 71.93008988935803, 71.97509409546791, 72.02032868965722, 72.06524572042835, 72.11006343731079, 72…	northerly	1.0	1.0	0.0	0.0	0.0
2004-02-08 23:15:00	[203.4980857751084, 203.60038096703929, 203.7010305548522, 203.81152099305373, 203.9325012877754, 204.05443848332044, 204.1627598181543, 204.2587721515018, 204.3555500144978, 204.45354650279145, 204.54461472398728, 204.62492645829715, 204.69705382286557, 204.76211125568824, 204.82885118375384, 204.90813947702955, 205.0028001833496, 205.0879358908836, 205.15647573650077, 205.2064271647733, 205.263…	[71.46511971392847, 71.49658214050771, 71.5276960029222, 71.55566194082665, 71.57958891869234, 71.60392467583137, 71.63399107609794, 71.66679707148027, 71.7001665527433, 71.73407400112744, 71.76951003788162, 71.80629646227429, 71.84547033781088, 71.88573302112695, 71.92481774963365, 71.9614645691009, 71.99671435260449, 72.03320772114141, 72.07209447245036, 72.11378945290684, 72.155228451646, 72.1…	northerly	1.0	1.0	0.0	0.0	0.0
2004-02-09 22:20:00	[203.10491148069136, 203.20818278729547, 203.31667382547303, 203.432426967956, 203.54541909504496, 203.66538134255924, 203.80299432817947, 203.9426802180593, 204.08188185234224, 204.2216687058493, 204.3593629756487, 204.5002860238504, 204.63939939998556, 204.7770513393074, 204.91860844419236, 205.05446387002877, 205.1887409680794, 205.32154351122583, 205.45612378726645, 205.5832013942324, 205.711…	[71.35845929731825, 71.39050513383066, 71.4180581182603, 71.44387153759624, 71.46976467888948, 71.49326554043958, 71.50509751047039, 71.50917586458621, 71.51301884312826, 71.51809448603142, 71.5261535509826, 71.53348376637804, 71.52612976212572, 71.51871618193154, 71.5207020240297, 71.53095084152524, 71.54508535267533, 71.55983290815102, 71.57607658315541, 71.59777098093079, 71.61697891816237, 71…	easterly	0.0	0.0	0.0	1.0	0.0
2004-02-17 13:40:00	[203.16736999540691, 203.29548161174503, 203.4182243679797, 203.54389000402497, 203.6671512315491, 203.780881015336, 203.84042271819249, 203.89545593153807, 203.92868165545408, 203.9698385427646, 204.05555520295144, 204.1666116227164, 204.27649944618025, 204.3550851880819, 204.41491653666915, 204.48933843955356, 204.54583536504012, 204.56580227709205, 204.6038858999404, 204.64520900156572, 204.68…	[71.41455629806472, 71.42922679060294, 71.4496593825625, 71.46910372609199, 71.49062618014278, 71.51729447937916, 71.55641138180187, 71.59830837603613, 71.64173752977301, 71.68467652999564, 71.7206276683718, 71.7497568996949, 71.77798078302706, 71.81513060686575, 71.85607366581874, 71.89499061263645, 71.93621521151344, 71.98117821486935, 72.0237875704973, 72.06683747031624, 72.11005278533, 72.150…	northerly	1.0	1.0	0.0	0.0	0.0
2004-02-20 12:35:00	[203.52853372820087, 203.61925624894235, 203.73095661370448, 203.8658042316381, 203.9919970956434, 204.1019347398164, 204.19793691608936, 204.29737570142888, 204.39275924373385, 204.47296952352443, 204.55291158262543, 204.64055153172856, 204.7359113197356, 204.84346527075095, 204.97109320117536, 205.1037806195384, 205.2332513253828, 205.36452128436824, 205.4967906719097, 205.62746142481964, 205.7…	[71.45892638121518, 71.49321060190469, 71.5193537288687, 71.53281058912545, 71.55468097322714, 71.58335405533387, 71.61505470281833, 71.64673795458248, 71.67901284392944, 71.71581618496822, 71.75375190270002, 71.78931996276683, 71.82294405625132, 71.85252488280425, 71.87380142815309, 71.89265766025716, 71.91286591207567, 71.9311030744132, 71.94777854865825, 71.96431552872484, 71.98543042772698, 7…	easterly	0.0	0.0	0.0	1.0	0.0
2004-02-20 22:00:00	[203.1535541017169, 203.2603567887568, 203.3622080544876, 203.4605386982872, 203.56693836245165, 203.68331649867997, 203.81643103167383, 203.9531455987072, 204.09468093844987, 204.23470972897533, 204.3750701455569, 204.51569557830595, 204.6557420289248, 204.79576904719173, 204.93512986568692, 205.0719875621428, 205.2070797175986, 205.34230563696136, 205.47937281664215, 205.61905832348464, 205.760…	[71.35244739330352, 71.38144801282066, 71.41289014121928, 71.44632102315424, 71.47598397786015, 71.49881845881363, 71.51581089000379, 71.52257088252192, 71.52308145403968, 71.52345966131689, 71.52636152344445, 71.53124755160822, 71.53702335650362, 71.54371962131216, 71.55241676286111, 71.56385881031754, 71.57722260552345, 71.5906184630985, 71.60188966366354, 71.60941392002249, 71.61313772323197, …	easterly	0.0	0.0	0.0	0.0	0.0
2004-03-02 05:05:00	[203.12591770364065, 203.22233152200704, 203.32528709885904, 203.4087136958384, 203.47370497935995, 203.5638620976627, 203.65510008186243, 203.74985672867624, 203.8452953823682, 203.93053337598548, 203.9999464601381, 204.03927672491045, 204.0684363692916, 204.1097691366964, 204.1816912716864, 204.26658119030316, 204.33865391514243, 204.39122613179347, 204.4265121259992, 204.46635762297723, 204.50…	[71.3427371510564, 71.3751680254865, 71.40588336130193, 71.44202703162908, 71.48131433483536, 71.5157537790358, 71.55012973527072, 71.58376450599795, 71.61732586611689, 71.65301967690074, 71.69219863272352, 71.735292905114, 71.7789249436078, 71.82166842945094, 71.86084423623056, 71.89766802712903, 71.93607524331338, 71.97799738712814, 72.02172391506838, 72.06542347186027, 72.10885755599877, 72.15…	easterly	1.0	0.0	0.0	1.0	0.0
2004-03-02 21:40:00	[202.96774146382535, 203.08405233306016, 203.19066493066472, 203.28942280236544, 203.3947512023753, 203.50105310363244, 203.6085981978418, 203.7297888363474, 203.8518339793346, 203.97434549671323, 204.0979250435129, 204.21862216217872, 204.3531591407205, 204.4920232102802, 204.6230700526412, 204.7598044551254, 204.8994696496256, 205.04195374733263, 205.1764249176552, 205.3111748176311, 205.447919…	[71.32193209906853, 71.34753108963524, 71.37784714190039, 71.40946681013762, 71.44079181811655, 71.46992288604075, 71.49830546604366, 71.51956892884189, 71.5409337932025, 71.5633577251279, 71.58485012466862, 71.6080540450203, 71.6182348925245, 71.60467299954804, 71.58791383796483, 71.5756948513891, 71.57244096067802, 71.57986462984874, 71.594546230541, 71.6097726801129, 71.62231214087664, 71.6317…	easterly	0.0	0.0	0.0	0.0	0.0
2004-03-13 06:25:00	[203.2401901448547, 203.34343239395344, 203.45973090207625, 203.59239466026665, 203.7226721787041, 203.8494798570381, 203.9728910260551, 204.10414677536244, 204.23860054768824, 204.37215048276863, 204.50115133112087, 204.6267431701604, 204.75927549273345, 204.8985879683692, 205.03971597496604, 205.17931453679392, 205.32137022716535, 205.46728285417404, 205.6080710540877, 205.74850588113264, 205.8…	[71.39290372620512, 71.42165861849003, 71.44672258648325, 71.46403606165765, 71.48033186345118, 71.50122562821151, 71.52266188879128, 71.54108626843178, 71.55396948320656, 71.56674905780501, 71.58416387843681, 71.6046756536444, 71.61995826920285, 71.62885389560019, 71.63150750292195, 71.63020497707494, 71.62822986883084, 71.62669680988542, 71.62476980515635, 71.62156388623158, 71.61712520577349, …	easterly	1.0	0.0	0.0	1.0	0.0
2004-03-19 12:55:00	[203.09401155240653, 203.16056938895736, 203.2517569923428, 203.33621166261136, 203.3616443011096, 203.38303715546036, 203.43836369744307, 203.5462512546542, 203.63291585050308, 203.66599973417857, 203.7306129846189, 203.7872782652845, 203.79971199186977, 203.81077807510752, 203.85059437123505, 203.8821209728223, 203.9065400661357, 203.9386142194618, 203.98344084592637, 204.07679574510436, 204.16…	[71.35645297232674, 71.39588679671003, 71.42965818845937, 71.46563398221296, 71.50950498319159, 71.55379907593323, 71.59505429200567, 71.62377088006248, 71.65761400069266, 71.70163686276507, 71.74185493862322, 71.78226896712506, 71.82658022919904, 71.87138448957522, 71.91396743555609, 71.95813661230127, 72.00280278271491, 72.0458680544776, 72.08761717584134, 72.12141383199238, 72.15775390613544, …	southerly	1.0	0.0	1.0	0.0	0.0
2005-02-07 22:40:00	[203.1607455260244, 203.2810663816316, 203.39821791615543, 203.51836122864776, 203.64547773431337, 203.7779625970473, 203.90448585003492, 204.0329546539777, 204.1559431205988, 204.27819221985723, 204.40071275038545, 204.520449412588, 204.6384607318119, 204.746244326068, 204.86200759731196, 204.98425465834796, 205.1045649774574, 205.22463145322607, 205.329988909295, 205.4317086652592, 205.53595428…	[71.38194085208313, 71.40571429958008, 71.42991591969565, 71.45186126294129, 71.47044826658056, 71.48823719927083, 71.50550941432196, 71.52489333791664, 71.54651607610182, 71.57039186335464, 71.594806399963, 71.61936853053062, 71.64575807773994, 71.67513726327493, 71.70121075921568, 71.7235973690227, 71.74595836775958, 71.77147392102633, 71.8020758761153, 71.83363243148892, 71.86468677596491, 71.…	easterly	1.0	0.0	0.0	1.0	0.0
2005-02-08 06:50:00	[203.34487576215903, 203.45335504058684, 203.58055224281543, 203.71400988994, 203.84264706899265, 203.96767367681903, 204.0903379676928, 204.21306382151943, 204.33182723818533, 204.44870602943743, 204.56365574225575, 204.68097686284256, 204.8002601634542, 204.91681322547493, 205.0340649623537, 205.1520738766142, 205.27057390727305, 205.38833087094685, 205.5202749802284, 205.6610569073432, 205.789…	[71.41110017794529, 71.44055963872529, 71.45963773153102, 71.4736870373514, 71.48978500470676, 71.51027832777767, 71.53150985456519, 71.55337140861847, 71.57677171266393, 71.60222844629291, 71.62864282798486, 71.65378139279937, 71.67907508084281, 71.705005200275, 71.73053486475918, 71.7560975215205, 71.78149651739892, 71.80708339454915, 71.82218118845344, 71.82581456977934, 71.84230425048779, 71.…	easterly	0.0	0.0	0.0	1.0	0.0
2005-02-25 13:05:00	[203.319308851174, 203.4193786891377, 203.533595173558, 203.663833992753, 203.7933677519722, 203.9177758782877, 204.02612450056708, 204.13880602555105, 204.258578136246, 204.37430639406773, 204.47325887219444, 204.55007129030813, 204.5802660179993, 204.5752159217356, 204.6234760804194, 204.7080045607049, 204.8091233731464, 204.90967467121905, 205.00838920354244, 205.1154591326185, 205.19612023153…	[71.39540589515667, 71.42685472603921, 71.45237734181451, 71.47221764066153, 71.49041668792717, 71.51281184687645, 71.54138152478939, 71.56806517103858, 71.59236511911917, 71.61890733072268, 71.65191415872559, 71.68910439277488, 71.73265611340648, 71.777383299629, 71.81940007046751, 71.85630363909205, 71.88920441186242, 71.92197160954194, 71.95465750162603, 71.98575745089849, 72.02323353644954, 7…	easterly	1.0	0.0	0.0	1.0	0.0
2005-03-04 13:10:00	[203.19734390216837, 203.3111221562177, 203.4203849747641, 203.5384839247037, 203.66184878704868, 203.78623657158207, 203.9035111374049, 204.01409688040957, 204.12573742906167, 204.24408665730428, 204.36700335923877, 204.4785328219724, 204.59681370358552, 204.72075160139647, 204.85006846748837, 204.98355461251185, 205.11945256115507, 205.2534071518126, 205.3884714721576, 205.5261757487505, 205.66…	[71.37547943154036, 71.40228769800729, 71.4309094954474, 71.45546422657793, 71.47724062427054, 71.49880738935482, 71.52343530500369, 71.55119212866803, 71.57847872886376, 71.60261087552996, 71.62388460945556, 71.65287539027528, 71.67882554611406, 71.70177679622233, 71.72190388147379, 71.73663817285019, 71.75034009496692, 71.76763861654365, 71.7813090296755, 71.78980570486193, 71.79753467106815, 7…	easterly	1.0	0.0	0.0	1.0	0.0
2005-03-08 22:10:00	[203.30793058628933, 203.41674423865248, 203.54134389005688, 203.66574642154995, 203.78842229486895, 203.90932986393224, 204.03085786501936, 204.15548387455743, 204.280420047997, 204.40469325048164, 204.5432103154237, 204.6846780698532, 204.8266299479197, 204.96883751361048, 205.10943623538756, 205.25147631251983, 205.394771046939, 205.5348648984032, 205.67698307962112, 205.82139454853805, 205.96…	[71.41005432015032, 71.43883970773064, 71.46132469567465, 71.48240224858091, 71.50551348047618, 71.52975148835591, 71.55403142614395, 71.5764176522772, 71.5979316755392, 71.61959015654077, 71.62480489738398, 71.62919957481232, 71.63339072043, 71.63721065963296, 71.64099452242051, 71.64392907423633, 71.64523251789487, 71.64549462845315, 71.64626393529383, 71.64945429475057, 71.65456190138585, 71.6…	easterly	0.0	0.0	0.0	1.0	0.0
2005-03-10 14:10:00	[203.16129500442844, 203.27606751893825, 203.38694159667207, 203.50307099149637, 203.6348630593398, 203.77213015166487, 203.91167929252697, 204.05422863404172, 204.19402902217587, 204.3357231744004, 204.47446562555643, 204.6126355790054, 204.75370788435563, 204.8930476159718, 205.03360160101872, 205.1754082305583, 205.31698312411936, 205.4565091382648, 205.5970717420917, 205.7384023920401, 205.88…	[71.38773128682551, 71.41334930204671, 71.44027469898256, 71.4655487718389, 71.48168842569578, 71.49005857089537, 71.49541498536684, 71.50134336483767, 71.50533750260938, 71.50748140217239, 71.51121956420519, 71.51654749795287, 71.52144921542482, 71.5270912374752, 71.53426626934986, 71.54020477940148, 71.54455939825687, 71.54886631540788, 71.55211216185484, 71.55450164961181, 71.55767982181493, 7…	easterly	1.0	0.0	0.0	1.0	0.0
2005-03-26 22:00:00	[203.12381851669213, 203.2620249862609, 203.39818613519577, 203.53057326154573, 203.6589242335952, 203.7810371271597, 203.90239252426076, 204.0389786715293, 204.17645876434892, 204.3113757678933, 204.43519260380788, 204.54269431587448, 204.641772059668, 204.7360167249908, 204.83271168531277, 204.9371188346912, 205.0454696825277, 205.15058343779285, 205.239759395278, 205.3191436085851, 205.3883094…	[71.44126187934584, 71.43845375839169, 71.45037240385085, 71.46631506132817, 71.48577783462108, 71.50899006939082, 71.5310586946586, 71.54304849583511, 71.5493448619828, 71.56195240766728, 71.58326231818774, 71.61271929811487, 71.64604794953753, 71.67747150787083, 71.70859495981827, 71.73953963558554, 71.76799022771965, 71.79827196232449, 71.83249558746446, 71.87036147276527, 71.9082732722336, 71…	northerly	1.0	1.0	0.0	0.0	0.0
2005-03-27 06:05:00	[203.3110187692571, 203.41665586829748, 203.5426290386441, 203.6753475118076, 203.81029166878483, 203.94536593387437, 204.07768392978784, 204.20510360972096, 204.32176889050453, 204.43847853764117, 204.5656693666393, 204.6926885589527, 204.8114427672298, 204.9164897802476, 205.0038385354772, 205.07325160959888, 205.1365446675416, 205.24165851287307, 205.3657543280214, 205.4881958156107, 205.60293…	[71.40492022771912, 71.4340961657355, 71.45392410562751, 71.46888956692564, 71.48159978201046, 71.49490698911754, 71.51049230061317, 71.52978841046198, 71.55589855110398, 71.58058031882419, 71.59996341642692, 71.6205009960913, 71.64514900323287, 71.67532392156224, 71.710657589059, 71.7498851091551, 71.79102471935215, 71.82045898698584, 71.8442270950316, 71.8686531887369, 71.89635776281916, 71.927…	northerly	0.0	1.0	0.0	0.0	0.0
2005-04-02 05:30:00	[203.30840794180875, 203.4183810262664, 203.5345999293725, 203.65310870274303, 203.7861716088527, 203.9265022598969, 204.06217792709276, 204.19394711695955, 204.32009877537405, 204.4451675588072, 204.571953372502, 204.69930131305424, 204.8234903925114, 204.94834059601533, 205.0699752091656, 205.18815312646035, 205.3085173267928, 205.4348850938096, 205.56811617087573, 205.70513335177807, 205.84385…	[71.40461351987406, 71.43342172242902, 71.45779996688425, 71.48099736159617, 71.49466845840023, 71.49860519420834, 71.50976120643847, 71.52586518317109, 71.54483408411153, 71.56509312467657, 71.58459717553976, 71.60408616587084, 71.62544676194902, 71.6475736407683, 71.66855434050596, 71.6936943400047, 71.71905679463308, 71.73984470073715, 71.75778938340389, 71.77057763939118, 71.77870161319632, 7…	easterly	1.0	0.0	0.0	1.0	0.0
2005-04-02 12:40:00	[203.23838569759943, 203.34160637530636, 203.45387574913084, 203.58237290968464, 203.71358793272043, 203.84394194690287, 203.9736684713328, 204.10261903613136, 204.23254438307995, 204.353797925392, 204.4857226420365, 204.6179514039588, 204.74276332454184, 204.87476206382829, 205.0064614406197, 205.1316984824045, 205.25003222089657, 205.3746279201489, 205.5038191072036, 205.64097183039613, 205.775…	[71.3918689442798, 71.42204482138466, 71.44878576730373, 71.46707279279813, 71.48334469029955, 71.50026093451059, 71.51814941081192, 71.53640273506214, 71.555206539382, 71.57804790182728, 71.5947574996652, 71.60810519885509, 71.62970103892351, 71.64860629943608, 71.66618093729514, 71.68813755773645, 71.71179081607485, 71.73423723047186, 71.75392108032383, 71.76763171594135, 71.77779532376316, 71.…	easterly	0.0	0.0	0.0	0.0	0.0
2006-03-02 22:20:00	[203.3980522924277, 203.53106189141067, 203.66451117475364, 203.7989594583048, 203.9343640644983, 204.0629619048003, 204.2013269030477, 204.3404829754883, 204.4813698351582, 204.62247511326453, 204.7593709588635, 204.8863844443943, 205.0081260710191, 205.12918391377903, 205.24064285643743, 205.34206278144572, 205.4463530242828, 205.55434413240263, 205.66218659330585, 205.75844948287448, 205.83457…	[71.4480460773157, 71.46528476827466, 71.48077553106886, 71.49437466150563, 71.50892102658054, 71.52512175042007, 71.53199187711319, 71.53083606491047, 71.53154887231612, 71.53768696194919, 71.54974622762472, 71.56777131909944, 71.58859646247168, 71.61133605570815, 71.63944671442607, 71.6703290549689, 71.70083573798136, 71.73079554151225, 71.76128623080376, 71.79440536114215, 71.83309215577762, 7…	easterly	1.0	0.0	0.0	1.0	0.0
2006-03-31 14:00:00	[203.5723989520786, 203.67165402669417, 203.76208669848907, 203.87193359835797, 204.00821903280948, 204.1494170835157, 204.29245053225495, 204.43306970838395, 204.57064298457925, 204.70454700176924, 204.8376233925404, 204.9775971916281, 205.1203299104749, 205.2545915725825, 205.37195144399303, 205.48214257755623, 205.59638434606512, 205.7080586482749, 205.82245172650136, 205.9607198882294, 206.10…	[71.51389378343428, 71.5453743841975, 71.57947083961609, 71.60672802288701, 71.61894984332173, 71.62331480485905, 71.62460670980879, 71.63110930651831, 71.64522109209742, 71.66302550546668, 71.67916129453239, 71.68492207511329, 71.68995291162638, 71.70410611487571, 71.72933574466872, 71.7587498204247, 71.78715997058414, 71.81561460271803, 71.84237403568073, 71.85521405412831, 71.86473139079058, 7…	easterly	1.0	0.0	0.0	1.0	0.0
2006-04-08 22:35:00	[203.6160340804805, 203.7217277590416, 203.84034395321817, 203.98075797939143, 204.1173375337648, 204.2507868212004, 204.37784048500663, 204.48408963352105, 204.5760766211, 204.65908475969337, 204.7424813006942, 204.82305470697636, 204.89517806612716, 204.9586880319783, 205.02835056225115, 205.1247473577509, 205.2443785272963, 205.3568133690288, 205.448833886659, 205.5235226380536, 205.5827658269…	[71.50800822789837, 71.53824480174342, 71.56269124687601, 71.57421682318613, 71.58738464006753, 71.60438105387098, 71.62506806122519, 71.65328345997348, 71.68770857814835, 71.7247829770022, 71.76098560317253, 71.79843100750324, 71.83698385906388, 71.87700161343733, 71.91476209805111, 71.94792971618944, 71.97463295045111, 72.0021273304143, 72.03646376373926, 72.07392740169648, 72.11459386109466, 7…	northerly	1.0	1.0	0.0	0.0	0.0
2007-01-03 22:50:00	[203.2184441529207, 203.3233837328539, 203.43878666971736, 203.5537406126107, 203.66280376230876, 203.73883652919997, 203.7571320299056, 203.7685333271517, 203.7811950022299, 203.7943155894648, 203.79818482302255, 203.81166706396323, 203.8457930429574, 203.9040787294172, 203.9577829111373, 204.0035763263639, 204.05553628634587, 204.0980481808752, 204.0821280060918, 203.99511546382945, 203.9247240…	[71.38753549989127, 71.41850841954924, 71.44467390607593, 71.46898704492932, 71.4956590071378, 71.53313936720811, 71.57718099240721, 71.62233799225771, 71.66768035986117, 71.7121786034571, 71.75678997785562, 71.80124269204407, 71.84479414909556, 71.88603156480939, 71.92707016567466, 71.96845475532052, 72.00950996138342, 72.05279809147913, 72.0968842709075, 72.13379392635103, 72.17319398219561, 72…	westerly	1.0	0.0	0.0	0.0	1.0
2007-01-04 12:30:00	[203.3411166902099, 203.4563257070529, 203.5746777175252, 203.6926162713023, 203.82289645299028, 203.9557132570201, 204.0755116639877, 204.18875620137652, 204.3135281422197, 204.4433712197668, 204.56983976016963, 204.67902176291875, 204.7628039167455, 204.81544719919907, 204.8671081483293, 204.9356954163561, 205.0169772834104, 205.0911898658886, 205.13939875273277, 205.1836741874908, 205.22861321…	[71.41869804115319, 71.44526859443577, 71.47067229238947, 71.49578646682139, 71.51122272813141, 71.52495559791728, 71.5482403324407, 71.57434838849787, 71.59536788988439, 71.61288158686048, 71.63409859714746, 71.66336267053596, 71.69986978968862, 71.74186029308729, 71.78434385377345, 71.82329267200349, 71.85948291651803, 71.8978995572483, 71.93968197973452, 71.9819498875586, 72.02502688338268, 72…	northerly	0.0	1.0	0.0	0.0	0.0
2007-02-22 06:00:00	[203.3453167088444, 203.44057162496117, 203.5647678967293, 203.69727016988747, 203.8283649252126, 203.95849956595825, 204.08019481973508, 204.2083296846504, 204.34624769750516, 204.4863755923513, 204.62641066824835, 204.76379825338103, 204.90220762667545, 205.04120042955955, 205.17025766856, 205.28545248201837, 205.41348911723185, 205.54560911521023, 205.68388909658836, 205.8056990019905, 205.898…	[71.40022733377185, 71.43341166067611, 71.45429047874657, 71.47052596843821, 71.4875040776998, 71.50515009895105, 71.52852654193306, 71.54739573942857, 71.55675423968466, 71.56551052316955, 71.5773301314933, 71.58881207454735, 71.5979090604809, 71.60746869536135, 71.62482680392722, 71.65041051127233, 71.67049681939201, 71.6859795930791, 71.6997757016892, 71.72122090629868, 71.75592370800038, 71.7…	easterly	1.0	0.0	0.0	1.0	0.0
2007-03-05 22:20:00	[203.26703063777285, 203.35626152903205, 203.46460622825987, 203.5776404334967, 203.6803835292374, 203.78074197381545, 203.8895953174874, 203.98530607828164, 204.0842839095893, 204.1873698592724, 204.27845881886503, 204.36267068268916, 204.43518172568017, 204.51062803139084, 204.60682774054985, 204.71091394912787, 204.8109929078285, 204.90248785451783, 205.0001339072904, 205.1001384097192, 205.20…	[71.39945050439842, 71.43405405877333, 71.46303833275581, 71.49057149930171, 71.52097952626501, 71.55171012400119, 71.58066647002573, 71.61366489573233, 71.6448768876303, 71.67556925209624, 71.70949947862566, 71.74520482868986, 71.78312615538506, 71.82148659011509, 71.85517486270837, 71.88640184164242, 71.91947438144146, 71.95348282895, 71.98656656476788, 72.01812298910907, 72.04862351023439, 72.…	southerly	1.0	0.0	1.0	0.0	0.0
2007-03-09 14:05:00	[203.3477672557949, 203.44435014938185, 203.53735714250195, 203.62929881999477, 203.76340718459, 203.9031456534734, 204.04120446663225, 204.1763693957641, 204.30733667965964, 204.4332205870268, 204.5545117846926, 204.6749886313655, 204.80128537686116, 204.93540459574555, 205.0742218333293, 205.21525583765373, 205.3565873647769, 205.49707318322595, 205.63700970123637, 205.77684153399247, 205.91752…	[71.4195246784712, 71.45333071555757, 71.4870025043532, 71.52089541736481, 71.51023744170932, 71.51537761317763, 71.52587273944782, 71.53969165790235, 71.55657783100068, 71.57678722172626, 71.60008801739049, 71.62375343176865, 71.64417574147957, 71.65908471931468, 71.66871836070189, 71.6751393393601, 71.68106394528567, 71.68826246104928, 71.696821003301, 71.70538661405497, 71.71266789657366, 71.7…	northerly	0.0	1.0	0.0	0.0	0.0
2007-03-17 22:45:00	[203.28345975218943, 203.3997012967324, 203.5309785338556, 203.66926562559087, 203.8073929618824, 203.9395117807944, 204.05636539803064, 204.14248041522555, 204.24140988294224, 204.36046551794703, 204.48182919364405, 204.60258945309192, 204.7177531877333, 204.8368277231092, 204.95326968289243, 205.07015545266452, 205.18789126421493, 205.30222121455495, 205.4140150335978, 205.51608992102211, 205.5…	[71.52208613476736, 71.54817945039476, 71.5644229157017, 71.57513423588742, 71.58656701171606, 71.60251089331018, 71.62777081453824, 71.66264318595198, 71.69424567560728, 71.7192007083364, 71.74187100226132, 71.7661913869017, 71.7939014612571, 71.81863577483482, 71.8444118320448, 71.86910940395171, 71.89540054822646, 71.9226550476215, 71.952246943618, 71.98430148215853, 72.02498022267153, 72.0642…	southerly	1.0	0.0	1.0	0.0	0.0
2008-01-06 22:50:00	[203.30616591454097, 203.44388816513745, 203.57900381654528, 203.7114829150602, 203.8425872719683, 203.96915232360075, 204.09114263295376, 204.2096882787394, 204.34836728136065, 204.4803790270155, 204.5994734846265, 204.73768986396232, 204.8782282434317, 205.02234984800455, 205.16363970245945, 205.30597788122407, 205.44458046762583, 205.57944274358067, 205.70953732695068, 205.8362338665469, 205.9…	[71.45606831556309, 71.45857601761577, 71.4712408846828, 71.4856981632366, 71.50217402311064, 71.52162337991886, 71.54453749103185, 71.56870966965127, 71.58056610163345, 71.59707288860294, 71.62028292963247, 71.63031901228423, 71.62619808424469, 71.62216885632408, 71.62270747340986, 71.62858297831802, 71.63955206585044, 71.65416258653893, 71.670746953432, 71.69053408369945, 71.71607522440405, 71.…	northerly	1.0	1.0	0.0	0.0	0.0
2008-01-26 05:50:00	[203.2127627009704, 203.32059631729985, 203.43300158026184, 203.5529627160372, 203.67407527705157, 203.78773263448213, 203.8921897519137, 203.9755360365105, 204.02821709631377, 204.0654542582696, 204.10973097838345, 204.16906479774784, 204.238435509067, 204.3126256052136, 204.3846362420672, 204.43186150862408, 204.4815530942413, 204.55825286850975, 204.65104037456908, 204.73146197060137, 204.7812…	[71.39203129056321, 71.42043453084968, 71.44631931195542, 71.46923373299067, 71.49359167396668, 71.52099108794368, 71.55163254921379, 71.58727853537093, 71.62989661762514, 71.67355796685052, 71.71633030532874, 71.75729731487144, 71.79649455063584, 71.83463737469393, 71.87334713084043, 71.91544243869575, 71.9570742282115, 71.99546388614651, 72.02963191297236, 72.06640363783544, 72.10921184132735, …	westerly	1.0	0.0	0.0	0.0	1.0
2008-02-09 22:35:00	[203.1938029600862, 203.3126980631094, 203.44025285433216, 203.5707963997311, 203.70598436490175, 203.8398442279716, 203.9413028022451, 204.0281778393533, 204.14792374980192, 204.2666001338952, 204.30185908212687, 204.34196386391912, 204.43662767717785, 204.5442319923976, 204.6563939728948, 204.77932012930316, 204.90700858363695, 205.0425054747956, 205.18009632090676, 205.32622167641037, 205.4722…	[71.41759182013254, 71.4406381299313, 71.46032305874617, 71.4774607871518, 71.48956493875637, 71.5047002864309, 71.53465017546587, 71.56985501401014, 71.59404697717106, 71.61690022580902, 71.65865918690801, 71.70067246364405, 71.73408424886232, 71.76293866421551, 71.79183383228175, 71.81455377746096, 71.83348831468135, 71.85059117160911, 71.86097485175726, 71.86664365980825, 71.86999358355706, 71…	northerly	1.0	1.0	0.0	0.0	0.0
2008-03-14 22:25:00	[203.01490525952477, 203.10739105112137, 203.20878598256957, 203.31764535258253, 203.4314136461857, 203.5454431668865, 203.6578483197097, 203.77021625450004, 203.878364745176, 203.97293295763836, 204.07504642832592, 204.18068045204583, 204.2931201971927, 204.43167371259727, 204.5740363320353, 204.7156643753545, 204.8548304371755, 204.9838080729853, 205.10786572112505, 205.2321897868789, 205.36233…	[71.33390227691123, 71.36725211874685, 71.39781109540624, 71.42582417716608, 71.45231964391483, 71.47843130300792, 71.50518798682141, 71.53284496835626, 71.56202652453196, 71.59673286133601, 71.6286818314071, 71.65901078375258, 71.68688152461532, 71.69705526238545, 71.69662343697942, 71.69543483034093, 71.70302222679953, 71.72063192635251, 71.74204310029425, 71.76331688195853, 71.7837271853854, 7…	northerly	1.0	1.0	0.0	0.0	0.0
2008-03-16 22:10:00	[203.1005302055701, 203.21291936432988, 203.3292308236807, 203.4451774247147, 203.5639133495217, 203.6860537144396, 203.81372868410568, 203.943838442129, 204.07222357612105, 204.19221014365476, 204.2875433181352, 204.3689192880533, 204.4575263489768, 204.59100677892772, 204.73075159556177, 204.8702899813868, 205.0127823801112, 205.1536318490636, 205.2943185768532, 205.4319391410865, 205.570449124…	[71.38486697207931, 71.41172394099914, 71.4372247876805, 71.46193328759621, 71.48618541636516, 71.50821964158006, 71.52794396157277, 71.54632215310998, 71.56507340458401, 71.59022435779542, 71.62398590549917, 71.66068646849533, 71.69613801080743, 71.71310524955854, 71.72466348952467, 71.73234026478914, 71.73377669239619, 71.72841509297635, 71.71846897977139, 71.70701310448442, 71.69770227601934, …	easterly	0.0	0.0	0.0	1.0	0.0
2008-03-29 21:40:00	[203.28745355365453, 203.3243791955862, 203.41205424758695, 203.54287063905244, 203.68304175515533, 203.8241308270668, 203.96468519539448, 204.1051523377416, 204.23870780939097, 204.3584495801929, 204.4808474474941, 204.61756439407264, 204.75644251080823, 204.89639900283004, 205.03420704338797, 205.17149259928505, 205.3093803920869, 205.44997050399704, 205.58647258482205, 205.7264502500734, 205.8…	[71.40058142692506, 71.44394579901534, 71.47737922628563, 71.49222717143886, 71.49043146922918, 71.48688068688729, 71.49191966419563, 71.49476253041693, 71.48172776094815, 71.45969863817618, 71.44014537306492, 71.42801786164914, 71.4232869203351, 71.4196878452604, 71.41310182302064, 71.40435723333563, 71.39543256512346, 71.38765151423402, 71.38264744473942, 71.3807474228176, 71.38201077459482, 71…	southerly	1.0	0.0	1.0	0.0	0.0
2008-03-30 13:00:00	[203.11336282646704, 203.2431540568261, 203.37157986918663, 203.50098714028755, 203.63244444902435, 203.7686668837866, 203.911107588998, 204.05465198083635, 204.19615405246145, 204.3370627374676, 204.4771620319292, 204.61999011543853, 204.75717412226507, 204.8943051227546, 205.03515203982047, 205.17617415233323, 205.31625588897631, 205.45732529699015, 205.5966176137614, 205.73565372290903, 205.87…	[71.41063090279832, 71.42760065402372, 71.44456363968246, 71.46291192811503, 71.4804838005785, 71.49125813316901, 71.49565963215282, 71.49880913594913, 71.50084465511372, 71.50195342036815, 71.50122594920686, 71.49723881842209, 71.4910246871201, 71.48451929241817, 71.47975188242494, 71.47590496463849, 71.47150019701583, 71.4658218190001, 71.45902039492096, 71.45113167451836, 71.44245311234377, 71…	easterly	0.0	0.0	0.0	1.0	0.0
2009-02-05 21:35:00	[203.27014834547268, 203.4055124826888, 203.5424991108053, 203.6861031643128, 203.82635550031355, 203.96311250659645, 204.0916860268749, 204.22139198147957, 204.3521633530932, 204.48451783066545, 204.61442954317653, 204.7402026823533, 204.8626631076844, 204.98300729906123, 205.09605219604083, 205.20900907941336, 205.32467704447112, 205.4480047671175, 205.5789048489657, 205.7138276719823, 205.8518…	[71.43893362212152, 71.45228430437442, 71.46391444433641, 71.46925606722907, 71.471899411154, 71.48232866097294, 71.5005932772785, 71.52013278535095, 71.53700805032213, 71.55294703183847, 71.57098508618522, 71.59116649565023, 71.61371977626305, 71.63849287204906, 71.66340070401077, 71.68870425938687, 71.7134367795304, 71.73608381153296, 71.75454367218671, 71.76793171954665, 71.77881929395153, 71.…	easterly	1.0	0.0	0.0	1.0	0.0
2009-03-08 22:30:00	[203.38417984808223, 203.48778117532623, 203.6131211798572, 203.7485125359799, 203.8875193696009, 204.0282062463855, 204.16774544956712, 204.307427799392, 204.44675235242343, 204.58805748307705, 204.72303253032095, 204.8463617827337, 204.9741749565061, 205.1054898051991, 205.23666242132677, 205.36054062327105, 205.4786387587845, 205.58971563347137, 205.6854605616423, 205.7694927847128, 205.855517…	[71.41831447053224, 71.44875148285078, 71.46872677578813, 71.4809807634924, 71.48874922622777, 71.49552992676163, 71.50319441008405, 71.51040087009494, 71.50828313242036, 71.50907510333536, 71.52319272131017, 71.5447775617816, 71.56388236836042, 71.58037990702125, 71.6000791941706, 71.6241990842098, 71.65109620495355, 71.68074205005844, 71.71324332600605, 71.74904095134507, 71.78503343402902, 71.…	easterly	1.0	0.0	0.0	1.0	0.0
2009-03-14 21:55:00	[203.4066299178594, 203.52688160572228, 203.6532443720217, 203.78993577608168, 203.9257670101146, 204.0668033683984, 204.20554447477312, 204.34547361783257, 204.48446442100135, 204.62451525475916, 204.7662922319641, 204.9061235203269, 205.04922048216176, 205.1885133246931, 205.3258438773556, 205.4626037438412, 205.59761203318087, 205.7313794027076, 205.86432752848347, 205.99772252050064, 206.1318…	[71.44350847899528, 71.46632026390566, 71.48579238667347, 71.49867672651749, 71.5073311869139, 71.51440904826592, 71.5209306430335, 71.52721763444593, 71.53335054684307, 71.53961426649714, 71.54428067796682, 71.54731795306614, 71.55136926810205, 71.55789274107791, 71.56701780039865, 71.57871695454773, 71.59240024264797, 71.6077760681181, 71.62425334286154, 71.64099143548367, 71.65654317751573, 71…	easterly	1.0	0.0	0.0	1.0	0.0
2009-03-16 14:00:00	[203.1615184193305, 203.28351123004003, 203.3977015675968, 203.53086230294176, 203.6713104664743, 203.81189724362497, 203.9497552265922, 204.07368359115048, 204.17827130921685, 204.28312750970815, 204.37154771521065, 204.4397580952872, 204.49967153283583, 204.5983648698754, 204.7069641202046, 204.80953573044044, 204.90353011191175, 204.9867358406784, 205.0583158046164, 205.14615794677545, 205.231…	[71.41931033070655, 71.44324085664661, 71.46885959655307, 71.4845382045959, 71.49027001762424, 71.49384392817298, 71.5027792558956, 71.52503923078915, 71.55549183060435, 71.5849129162449, 71.61942929308644, 71.65846105177054, 71.69971281984927, 71.7329359728561, 71.76205992641957, 71.79374825612352, 71.82708405082906, 71.8638738991377, 71.90307530970328, 71.93866805218529, 71.9754004861961, 72.01…	northerly	0.0	1.0	0.0	0.0	0.0
2009-03-17 05:50:00	[203.3008650254251, 203.42768187801192, 203.54618492990812, 203.66846107524697, 203.7950115492341, 203.92991159032508, 204.06480413665705, 204.19358469458135, 204.32062868456435, 204.4349141882968, 204.56743051944184, 204.70832463550795, 204.85306853764897, 204.9940631719601, 205.12519712562343, 205.2404386230188, 205.35251953018056, 205.45726204385144, 205.54668456782773, 205.61975218716017, 205…	[71.4112441813396, 71.43069679267256, 71.45294116608346, 71.47462275569029, 71.4933459339442, 71.50804716190592, 71.52296552834252, 71.53986896106662, 71.55979748638175, 71.58695364361813, 71.59994224828519, 71.59986182025706, 71.5996840979707, 71.6031582591281, 71.61944517725937, 71.64678802737942, 71.67385279436745, 71.70435726301099, 71.73910843121749, 71.77848654291543, 71.81760649195839, 71.…	northerly	0.0	1.0	0.0	0.0	0.0
2009-03-19 05:35:00	[203.37239679475408, 203.45862101438465, 203.52861419776636, 203.6086787081048, 203.74813105208676, 203.88874011678973, 204.0259358576651, 204.15837568924144, 204.2844178046932, 204.40647522317656, 204.5479679648184, 204.68782407686345, 204.8288624403766, 204.96499870978244, 205.09416632060905, 205.2276129593624, 205.3661109301714, 205.5016884128629, 205.6347837780964, 205.77566187841728, 205.916…	[71.42115763519547, 71.45643308329693, 71.49473088474089, 71.51401623736479, 71.50891000971468, 71.51215907824913, 71.52235791117336, 71.53807222743137, 71.55897935194221, 71.57887323788685, 71.57497316175287, 71.56713822890097, 71.56556180167652, 71.57806136841937, 71.59794313217853, 71.61372983145192, 71.62531397938109, 71.63872842785541, 71.65482378476912, 71.66389682670585, 71.66390038839639,…	easterly	0.0	0.0	0.0	1.0	0.0
2009-03-30 05:20:00	[203.27248711367272, 203.36451663306272, 203.47393932969896, 203.59925851762532, 203.72127254824235, 203.84939904647536, 203.9834344292586, 204.1226581578378, 204.26450123121583, 204.4053207488477, 204.54398834203477, 204.68494930838904, 204.81039057689017, 204.9326565725188, 205.05433987384103, 205.17725118544135, 205.30566468386465, 205.44006885440385, 205.5728398418616, 205.70856605777365, 205…	[71.40055354525262, 71.43337826374918, 71.46129438979276, 71.48334191683875, 71.50458633015614, 71.52357288229923, 71.53645425513996, 71.54301510850621, 71.546977406369, 71.55292034108005, 71.56047809143678, 71.56209025790002, 71.580780996611, 71.60274788544723, 71.62599415761707, 71.64986956844598, 71.66808725187491, 71.68556033884572, 71.70323332168186, 71.71770050713357, 71.7256904693925, 71.7…	easterly	1.0	0.0	0.0	1.0	0.0
2009-03-31 06:00:00	[203.1983214631616, 203.3076460665365, 203.41517671442776, 203.52508602166623, 203.62365237807663, 203.7413754036084, 203.8832598253369, 204.02284517584, 204.16362778362875, 204.30459627751137, 204.44585671052047, 204.58703644111196, 204.7281656036931, 204.8704483933488, 205.01021821144064, 205.1498980250321, 205.29136958910632, 205.43193540400443, 205.57205343852348, 205.7112095176429, 205.84971…	[71.37874466031373, 71.40826661126832, 71.43670721835726, 71.46505102382235, 71.49678689523603, 71.51798976175081, 71.51587401813606, 71.5121039690411, 71.5114556656118, 71.5129005182974, 71.51271874275399, 71.51096883517613, 71.51053886236011, 71.51283283949836, 71.51647334965148, 71.52037549142693, 71.52405053667083, 71.52764341733402, 71.53241878062565, 71.53893285460309, 71.54740372521121, 71…	easterly	0.0	0.0	0.0	1.0	0.0
2009-04-01 06:45:00	[203.2856823927339, 203.40004001088164, 203.52841356855637, 203.65943839205, 203.7937487641368, 203.93232132244327, 204.07321613293595, 204.21137083894664, 204.3514669002236, 204.4925089987597, 204.6314746375208, 204.77246471705556, 204.91161050446564, 205.04994306983068, 205.19061907536016, 205.3302554714961, 205.47159600463144, 205.61258266251255, 205.7536468804981, 205.89187619485037, 206.0308…	[71.41194770594335, 71.43699644230915, 71.45693983226288, 71.47118288594507, 71.48243351505643, 71.49243105689582, 71.50147549861497, 71.50733317894704, 71.5077660358136, 71.50352960167257, 71.49604255254638, 71.48744016630596, 71.48179662179929, 71.48118614078798, 71.48421976931243, 71.48804409893728, 71.49121812323546, 71.49237572485858, 71.48927651159678, 71.48132540364736, 71.47274337929872, …	easterly	0.0	0.0	0.0	1.0	0.0
2010-01-09 13:40:00	[203.35763782352487, 203.48141323925952, 203.6055610965396, 203.7045932383407, 203.77416988060745, 203.8520111562348, 203.9377285457427, 204.0363138422385, 204.1396514696603, 204.2347810235858, 204.29056952170905, 204.3074788282709, 204.34837543862625, 204.36803763066607, 204.38151497907563, 204.47512347178892, 204.5961447007115, 204.71088926112412, 204.7944039207411, 204.8487021724352, 204.91232…	[71.42027209587214, 71.44127768230493, 71.46348453346143, 71.49431503807835, 71.53260599156553, 71.57061791072692, 71.60572634954497, 71.6379417817452, 71.66870522528907, 71.70207805620038, 71.74374609452036, 71.78844426648163, 71.8310201771355, 71.87540652622222, 71.91978334676392, 71.95274278369715, 71.97695403395107, 72.00411852216078, 72.04015109797365, 72.08151508807526, 72.12127659775064, 7…	northerly	1.0	1.0	0.0	0.0	0.0
2010-01-09 23:00:00	[203.1985069142519, 203.31628998494085, 203.4268758790524, 203.53609990661, 203.6427718969977, 203.74347286761983, 203.8235229539502, 203.893337089358, 203.9834646645149, 204.0767839192356, 204.16131239952352, 204.21647853207432, 204.35121496258327, 204.49515127492333, 204.63774966390187, 204.77536002430907, 204.9010188528201, 205.0067571391915, 205.0999694206729, 205.1989462299119, 205.319396636…	[71.37705297821533, 71.400581912637, 71.42889541908022, 71.45729266251634, 71.48694585309674, 71.5184268241663, 71.5541914341103, 71.59349289422293, 71.62800122353885, 71.6615349771316, 71.69765651362519, 71.73808495986006, 71.7464861598099, 71.74800074045488, 71.7536418091241, 71.76583185151543, 71.78698192530288, 71.81792909788942, 71.85165500923782, 71.88249514022465, 71.90826392950078, 71.929…	northerly	0.0	0.0	0.0	0.0	0.0
2010-01-22 22:30:00	[203.31182153042087, 203.40968477567571, 203.52180149008032, 203.63306801009625, 203.7701533231116, 203.9100118184136, 204.0513251533902, 204.1896326028158, 204.32644312649217, 204.46308835756167, 204.59989491672312, 204.73601304537556, 204.87741428497145, 205.01659998527268, 205.15766566441144, 205.2977803831608, 205.4330441888845, 205.57179542831625, 205.71033082178545, 205.8491840552484, 205.9…	[71.39630425639436, 71.4289340176872, 71.45637441360898, 71.48430064150011, 71.49362193818418, 71.49377216560241, 71.49526714863283, 71.50194734983704, 71.5134989171988, 71.518409666276, 71.50999381339513, 71.49974348864276, 71.49291754765858, 71.48812116707401, 71.48552169795718, 71.48641395869542, 71.49748939604369, 71.50837486174073, 71.51847523836774, 71.52974871522422, 71.54484547014782, 71.…	southerly	1.0	0.0	1.0	0.0	0.0
2010-03-16 22:50:00	[203.3439758095872, 203.44948006767132, 203.5530468780501, 203.6396226948125, 203.73344747561677, 203.8486108725588, 203.9713576599155, 204.0992925501424, 204.2292847047018, 204.3523995468831, 204.4708687474033, 204.5927611010137, 204.7152183449307, 204.84291614085583, 204.979415792709, 205.12384324743536, 205.26624885492916, 205.4084583010838, 205.55113337621876, 205.6894393790769, 205.825582594…	[71.41066997464665, 71.44145816015083, 71.47127126954197, 71.50736330301284, 71.54087895508313, 71.56630557741916, 71.58938914013419, 71.60844744892003, 71.62490976550464, 71.64810043018349, 71.67257492741273, 71.69559441300177, 71.71930903227242, 71.73909274522123, 71.75100828213425, 71.75498100010742, 71.75370541107884, 71.75636793135466, 71.75412894875994, 71.741841165377, 71.72763211063896, 7…	southerly	1.0	0.0	1.0	0.0	0.0
2010-03-23 13:30:00	[203.24700925362947, 203.36481141805635, 203.4943577334383, 203.6333169293164, 203.77124439838596, 203.91114661660424, 204.0506103602052, 204.1888706760312, 204.3238219315744, 204.4499862096825, 204.57229790583887, 204.69773036882611, 204.818582175711, 204.93579197297143, 205.0570793301411, 205.19091090581244, 205.32772333405592, 205.46818389464545, 205.60534939918605, 205.74383394192637, 205.883…	[71.42850923505783, 71.4533891312679, 71.46870850363915, 71.4774668485858, 71.48552868929647, 71.49123312314536, 71.49718820405796, 71.50586891550483, 71.51965536849976, 71.53981632458358, 71.5623346487452, 71.58211983108731, 71.60632104138368, 71.63067599287255, 71.65425511940732, 71.67211046956128, 71.68459741178559, 71.6935167703921, 71.70494333208012, 71.71747673206907, 71.72707187107484, 71.…	easterly	1.0	0.0	0.0	1.0	0.0
2011-01-28 13:35:00	[203.16517607632807, 203.2735372528325, 203.3915656053992, 203.5177990707168, 203.65409808613947, 203.78765704914235, 203.92243841846872, 204.05913441934783, 204.19848183624288, 204.33944922370304, 204.4771258275436, 204.6018339067601, 204.71271811292615, 204.8123811428564, 204.9154271038601, 205.05118661248184, 205.1810121578923, 205.3064034742979, 205.4312268666289, 205.55739970587624, 205.6863…	[71.38239442274626, 71.41001613700877, 71.43600962279613, 71.4562507018237, 71.4718056434768, 71.48364333052807, 71.49435050317462, 71.50424296792917, 71.51275788484737, 71.52116002611055, 71.53320209709094, 71.55313949706485, 71.57989376693693, 71.61208627691481, 71.64240660939896, 71.65599197300672, 71.6750637888424, 71.69652634834648, 71.71793685991975, 71.7385233336814, 71.75798250315728, 71.…	southerly	1.0	0.0	1.0	0.0	0.0
2011-04-22 22:35:00	[203.2345427670057, 203.341860296792, 203.4430112802614, 203.55892311848524, 203.6897864638408, 203.82752889233285, 203.9662481858956, 204.1043488692907, 204.23940495920849, 204.3719300900531, 204.50652136559327, 204.6449936752737, 204.78774601096083, 204.92989858993823, 205.07145165413448, 205.208131173164, 205.3405802362686, 205.4742762113248, 205.6120492439916, 205.75682210168011, 205.89727274…	[71.39121749271051, 71.42092245219796, 71.45207751122362, 71.47617461059413, 71.49156905676966, 71.50253231269905, 71.51177316046581, 71.52225222887158, 71.53585812147493, 71.55082520526089, 71.56403660290027, 71.57326193457908, 71.57658636645908, 71.57403503057401, 71.57594258652105, 71.58677879800103, 71.60176996002141, 71.61629665942148, 71.62628848038875, 71.62986593457286, 71.63014280685978,…	northerly	1.0	1.0	0.0	0.0	0.0
2012-02-19 21:55:00	[203.17765300327017, 203.29106109734917, 203.3940932060836, 203.49546942670003, 203.62019887682624, 203.75415164562108, 203.88648215932724, 204.0173662941557, 204.148469632052, 204.28002222317653, 204.4137055467036, 204.54225513627387, 204.6733034711068, 204.80610785551693, 204.9363282694747, 205.0618919739084, 205.1870848474266, 205.3111617354928, 205.44228786474116, 205.57192703629408, 205.6997…	[71.3804383387779, 71.4076390217104, 71.43848173962161, 71.46972460289163, 71.48903050466217, 71.50329463456134, 71.51732632733311, 71.53101569277635, 71.54465362158075, 71.5588587072833, 71.57444924787518, 71.59056068480233, 71.60793365646434, 71.62670981517529, 71.64681037617136, 71.66775656290197, 71.69001460356452, 71.711486287733, 71.73184255627065, 71.75148780656914, 71.77176284046669, 71.7…	easterly	1.0	0.0	0.0	1.0	0.0
2012-02-27 06:05:00	[203.07489031235764, 203.17400592151296, 203.2766160941287, 203.37652310936176, 203.4542335043296, 203.50356289609869, 203.5534598772304, 203.6124105456048, 203.67144151809, 203.71862097584835, 203.76187992239733, 203.81696930972424, 203.8869819307157, 203.96438666480265, 204.03944854844653, 204.11070968871945, 204.18735252035623, 204.27744113939625, 204.37543665866195, 204.47869685203275, 204.58…	[71.33083834921864, 71.36222019330293, 71.39281118522071, 71.42534370329693, 71.46112300470925, 71.50356265636825, 71.5456686012953, 71.58563636951995, 71.62669665398812, 71.66841942698048, 71.71125022920786, 71.75219654538867, 71.790779900455, 71.8288760276404, 71.86719537020944, 71.90630150614153, 71.94446074166918, 71.97959492532178, 72.01210829906174, 72.04376684469501, 72.07540519052023, 72.…	northerly	1.0	1.0	0.0	0.0	0.0
2012-03-22 14:05:00	[203.44472190789853, 203.5795006154241, 203.70266404111365, 203.7957800247246, 203.8564507413476, 203.9096807311033, 203.96597685689403, 204.0309718817664, 204.10721200676085, 204.1877706650784, 204.26475764239083, 204.316912596554, 204.35858028713835, 204.4035436302321, 204.45736732002396, 204.5115469441108, 204.56264792651132, 204.6156550238672, 204.67319369898445, 204.73326003712336, 204.79293…	[71.54115497169357, 71.55555840912774, 71.57654927964069, 71.60934780771099, 71.64978849506309, 71.69131400804665, 71.73243909464348, 71.77291428696296, 71.81156802033404, 71.84899271091646, 71.88687205026886, 71.92826109395915, 71.97104549616145, 72.01358186689177, 72.05595619170052, 72.0985405836989, 72.13994770622229, 72.18126053515648, 72.22187155888751, 72.2624513113436, 72.30296611564614, 7…	easterly	1.0	0.0	0.0	1.0	0.0
2012-03-24 06:45:00	[203.18778671943443, 203.30263020038444, 203.41822972047856, 203.53378298633783, 203.65677520747624, 203.79259644416723, 203.9348324484431, 204.0588725219764, 204.18670413786137, 204.31579312069485, 204.44319881404908, 204.57029248495755, 204.708186598945, 204.8436006417116, 204.97646469464283, 205.11359686354095, 205.2530104491798, 205.38750313676397, 205.52765733243908, 205.66718921074136, 205.…	[71.39640931004392, 71.4228616003681, 71.44837758104678, 71.47491915721622, 71.4956266052824, 71.50698764989994, 71.51099913641038, 71.53154802409216, 71.55158099739282, 71.57092248024807, 71.59106788895784, 71.61034333654014, 71.61799964494969, 71.60494647782136, 71.58916265570622, 71.57858983470663, 71.58097050681572, 71.59591792862466, 71.60425163079049, 71.61286719227412, 71.62458467791339, 7…	easterly	0.0	0.0	0.0	1.0	0.0
2012-04-05 22:05:00	[203.33614876829327, 203.4481449731121, 203.56154894279004, 203.67768542393236, 203.81173990027523, 203.94839376734237, 204.08570586437523, 204.2203631320852, 204.35515114472904, 204.48908986729373, 204.61851929357456, 204.74347648634136, 204.86696751266516, 204.99173011337675, 205.1198496555812, 205.24858959049232, 205.37859543260865, 205.5112503675243, 205.64641745173503, 205.78309145060345, 20…	[71.41933812709254, 71.44660221378756, 71.47389787254102, 71.497879431579, 71.51334806976539, 71.52473768749246, 71.5369826624985, 71.5504193750455, 71.5644243836034, 71.58025968431714, 71.59876839895584, 71.6200516875504, 71.64305236080108, 71.66532887760259, 71.6859462621922, 71.70465889104572, 71.72219936638686, 71.73937561962951, 71.7555322973193, 71.76909729574612, 71.78076737991373, 71.7932…	easterly	1.0	0.0	0.0	1.0	0.0
2013-01-10 06:20:00	[203.1615710855825, 203.2925279672729, 203.42181886705163, 203.5467832061157, 203.66157930980685, 203.75816964041348, 203.8348416333264, 203.89430638145177, 203.94140895620484, 203.9879743144961, 204.05496431706425, 204.13956788728183, 204.22865521531395, 204.3117394375591, 204.38365201007755, 204.45718269262957, 204.53302820861964, 204.60373564965357, 204.66479550847575, 204.7160682735112, 204.7…	[71.40526092949351, 71.41839463549086, 71.4364793671337, 71.45718003430392, 71.48374824987177, 71.51616557296515, 71.55357091858068, 71.59415567166714, 71.63678869224431, 71.6792226975872, 71.71919744639392, 71.7551691866253, 71.7892782864312, 71.82499363180769, 71.86349716725726, 71.90286768254279, 71.94084841531881, 71.9795716825183, 72.01915193368578, 72.06150613555965, 72.10398185265568, 72.1…	northerly	1.0	1.0	0.0	0.0	0.0
2013-01-11 22:00:00	[203.11262302419715, 203.21871966998447, 203.32689672947183, 203.44010692446344, 203.5630393811582, 203.69364763027883, 203.8259730345596, 203.9393022613401, 204.055056221546, 204.18060810271936, 204.30089510843783, 204.40799436296984, 204.53131047036837, 204.6668134665969, 204.8048365186447, 204.9427772664468, 205.07985780827917, 205.20789521590228, 205.3371547611393, 205.4755990277798, 205.6162…	[71.35762942353024, 71.38704876665182, 71.41489348201009, 71.44118250845884, 71.46354448626832, 71.48145936866476, 71.49788002953, 71.52309650652428, 71.54894150111332, 71.56908951553648, 71.59252586873447, 71.62117771938009, 71.64385039443867, 71.65910542501993, 71.67091379760733, 71.68221775397943, 71.6962426161235, 71.71583302795007, 71.73358698488957, 71.74551442888578, 71.75147793010387, 71.…	easterly	0.0	0.0	0.0	1.0	0.0
2013-01-17 23:00:00	[203.3160685805359, 203.3938679168317, 203.4918270127153, 203.5946193098781, 203.72301798907705, 203.84635154276967, 203.9474482920092, 204.0438943482244, 204.1394226140374, 204.23434685456792, 204.3282482667097, 204.41685377921297, 204.49262166767335, 204.54794275520436, 204.59187253553168, 204.6419106964731, 204.7024571920051, 204.77156844734128, 204.8452379055257, 204.91820423931028, 204.98409…	[71.42371053458596, 71.46113892362887, 71.49372756049681, 71.52435939618744, 71.5317356170777, 71.55231121571646, 71.58364031410112, 71.61667900971926, 71.64996981387935, 71.68331544265185, 71.71709701372825, 71.75218973573622, 71.79022770932212, 71.83161367791357, 71.87436109115188, 71.91641390671444, 71.95707863773893, 71.99647260059407, 72.03508943707992, 72.07387699827035, 72.11367270275952, …	northerly	1.0	1.0	0.0	0.0	0.0
2013-01-29 21:50:00	[203.3556665759656, 203.49341829039997, 203.63673487495697, 203.7767114297696, 203.91415832714264, 204.05078627467407, 204.1938198923837, 204.33250814979215, 204.46867367126944, 204.59172291298583, 204.72604782348816, 204.8598918657262, 204.9960276361665, 205.13222827623525, 205.26971712643515, 205.41342474544547, 205.55314272446256, 205.6938224557601, 205.8332708461788, 205.9771813346859, 206.11…	[71.52216725906952, 71.51491497658266, 71.51209064300684, 71.51849623140356, 71.52807528871189, 71.53739323893606, 71.54716515729393, 71.55718972996117, 71.57021596839161, 71.59020526147565, 71.60722675007649, 71.62368146406871, 71.63884195714932, 71.65130307826925, 71.6613885256238, 71.66752941754565, 71.66616328405621, 71.66102618316103, 71.65791831473892, 71.65962941157606, 71.66649789498399, …	northerly	1.0	1.0	0.0	0.0	0.0
2013-02-02 23:00:00	[203.23627215737272, 203.3052912507781, 203.3977543698318, 203.51669992521897, 203.64867159695257, 203.7843533370349, 203.92212891920644, 204.05902990511171, 204.19549513329468, 204.3294949401777, 204.46312653666848, 204.5990193116094, 204.73626038347535, 204.87380562816548, 205.009177666116, 205.1478125422664, 205.28862309044024, 205.42712729256968, 205.5621737144845, 205.69579000781636, 205.829…	[71.39659361365116, 71.43568760984721, 71.46953137363457, 71.49298949013595, 71.50896507810666, 71.5218393812811, 71.53378060980077, 71.54554990854442, 71.55853279440309, 71.57279817734472, 71.58693012552675, 71.5997242285298, 71.61045194136894, 71.62021870643483, 71.63087973743363, 71.64204984961505, 71.6526743017743, 71.6645102893356, 71.67914453003938, 71.6956742210841, 71.71145859774575, 71.7…	easterly	0.0	0.0	0.0	1.0	0.0
2013-02-20 22:50:00	[203.3998354556825, 203.51185451961084, 203.62420897596996, 203.7434126349869, 203.86737911230824, 203.9951811273188, 204.1266391584653, 204.25980920737143, 204.39250103730797, 204.52488116533289, 204.6559332711929, 204.7855318314683, 204.9126968231276, 205.0354268720528, 205.152836106697, 205.26645367761787, 205.386445317937, 205.51318205018947, 205.6375336861944, 205.75742758783525, 205.8847357…	[71.4402387367664, 71.46808095287241, 71.4955060637765, 71.51958952299121, 71.54112625120834, 71.56050317657129, 71.57750159348336, 71.59306401079911, 71.60872116573186, 71.62511775790448, 71.64231130379554, 71.66058001787937, 71.68067515828585, 71.70329699321279, 71.72884961267299, 71.75611747093618, 71.77917955063435, 71.7988523227808, 71.82101110007963, 71.8449039958764, 71.86579455610445, 71.…	easterly	1.0	0.0	0.0	1.0	0.0
2013-02-21 14:05:00	[203.07603873505565, 203.18728962740985, 203.29970695999697, 203.4067692953879, 203.51165283605488, 203.6075936197276, 203.69753453097695, 203.7908003414005, 203.8897249072558, 203.99820569634863, 204.1238858899717, 204.26128381606924, 204.40076473469333, 204.54236021903557, 204.6843715648775, 204.82553140937992, 204.9633520682336, 205.09340639150065, 205.20411125343267, 205.29933921242, 205.4026…	[71.34969888572651, 71.37776414755483, 71.40617997274917, 71.4347294761092, 71.46424962891695, 71.49673040176803, 71.53118165060997, 71.56500863159727, 71.59704786812415, 71.62591658315509, 71.64680844358827, 71.65897863547097, 71.66650613653775, 71.66965969963653, 71.67158993507665, 71.67722718671084, 71.68867876161177, 71.7067663826487, 71.73442032976098, 71.76807598482776, 71.7986607112679, 71…	easterly	0.0	0.0	0.0	1.0	0.0
2013-04-16 06:20:00	[203.41839587604187, 203.524678868378, 203.6294270055565, 203.7376374646965, 203.85221279254912, 203.9794034372228, 204.1139517143258, 204.24882872233883, 204.38122353955737, 204.5191589213265, 204.66231863444077, 204.8031433277964, 204.94144707216915, 205.07017802339269, 205.1956387381574, 205.32567963765388, 205.4561515417556, 205.5866402149107, 205.7203763876093, 205.85694821032223, 205.992458…	[71.45128924544177, 71.48170709339297, 71.51110655303984, 71.539343798213, 71.56507316659358, 71.5864866588461, 71.60308324604308, 71.61893636628085, 71.63488580757077, 71.64471570214842, 71.64693240214166, 71.64997783364456, 71.65998750293858, 71.67646942757558, 71.69614772498673, 71.71560032335643, 71.73259775011007, 71.74826273923205, 71.76454572026148, 71.78118493945404, 71.79842449605525, 71…	southerly	1.0	0.0	1.0	0.0	0.0
2013-04-17 14:15:00	[202.99259214232944, 203.10957734816452, 203.2238170992389, 203.3302398554468, 203.4333823695964, 203.5414598410179, 203.65720725838327, 203.78102290644875, 203.9111703252584, 204.04199344382224, 204.16766060568744, 204.29081935197212, 204.42000405291, 204.5544165279953, 204.69111752821868, 204.83115702607407, 204.9708934549356, 205.111469098384, 205.2500793496681, 205.38620391681707, 205.5123216…	[71.36971498009491, 71.3944038853064, 71.42087539550437, 71.44960578560703, 71.4802106621938, 71.50852256026117, 71.53444548206224, 71.55612695503223, 71.57361973969174, 71.59072960357406, 71.61131047347241, 71.633727372235, 71.65216756291937, 71.66642924407326, 71.67802085987509, 71.68683617688777, 71.69480334888823, 71.70387727062752, 71.71420818807843, 71.72755381423825, 71.74870067471211, 71.…	southerly	0.0	0.0	1.0	0.0	0.0
2014-01-17 22:30:00	[203.21468195535027, 203.31855867606492, 203.43098694769827, 203.5496314608064, 203.6734116071677, 203.7846385121497, 203.91541956265087, 204.03714026919727, 204.13740539508257, 204.2082990971744, 204.24756584345624, 204.24052315404552, 204.20572813626717, 204.1414222716588, 204.12401355694905, 204.0730284209662, 204.00007881688245, 203.95233497878945, 203.88568554413655, 203.81403025001228, 203.…	[71.39180488033759, 71.42126698586931, 71.44898021588138, 71.47280632933663, 71.49331547422759, 71.51954935911614, 71.53751358293154, 71.560449836664, 71.59325596444467, 71.63187613620072, 71.67480657072412, 71.71900784521696, 71.76242484801955, 71.8020863350146, 71.84622502283345, 71.88817101433274, 71.9264394505642, 71.96892414448615, 72.00927793875455, 72.04819479452513, 72.08802889734103, 72.…	northerly	1.0	1.0	0.0	0.0	0.0
2014-02-14 06:20:00	[203.3897355225496, 203.50761756991085, 203.6422966368007, 203.7818255015224, 203.92518993523407, 204.0654973813416, 204.20689186222617, 204.34490709419848, 204.4706850859924, 204.58258544032, 204.7041986825652, 204.83166413624065, 204.96546177794565, 205.10268128183597, 205.23850470227072, 205.3722092988111, 205.50455358705383, 205.638341735669, 205.77478609670013, 205.9077634616624, 206.0425091…	[71.43637764263329, 71.46196234025751, 71.47088166720711, 71.47347508947118, 71.47677943277068, 71.4803612438449, 71.48460732167021, 71.49337331415029, 71.51331817623846, 71.53964018593808, 71.56247501553123, 71.58224976174188, 71.59655356738301, 71.60798913983052, 71.62039001693574, 71.63477776227394, 71.64918166399447, 71.66267288319258, 71.67628182388967, 71.69054592311068, 71.70788113846174, …	southerly	1.0	0.0	1.0	0.0	0.0
2014-03-10 12:40:00	[203.3158771226076, 203.41646531819097, 203.51780005293148, 203.6138912973255, 203.6898618676027, 203.73700919695355, 203.76797422689253, 203.8130672854872, 203.8754889875704, 203.9397917610999, 204.00729433163207, 204.09608132853543, 204.19357646163303, 204.2832009697246, 204.35398513443133, 204.38507144909565, 204.3535838996104, 204.33047502062496, 204.34915448977912, 204.3904002940451, 204.441…	[71.40873989279194, 71.44038103869977, 71.471364350111, 71.50403892131146, 71.5410588460569, 71.58411585911452, 71.62791853307087, 71.6701568391047, 71.71140888049682, 71.75224982246857, 71.79196258037868, 71.82731949316826, 71.86029466801159, 71.89522046701444, 71.93438105160747, 71.97724960387404, 72.02077259816895, 72.06413791148425, 72.10812466811055, 72.15022233782149, 72.19093500826602, 72.…	northerly	1.0	1.0	0.0	0.0	0.0
2014-03-11 06:15:00	[203.16200723838097, 203.28294911749805, 203.39530512823123, 203.49898853556965, 203.5939531425709, 203.71698284522867, 203.8568006503604, 203.99780218345188, 204.13900529001955, 204.27140788924265, 204.39149189051813, 204.51281893295743, 204.63475192599023, 204.75968982708383, 204.88464805582203, 205.01020228736505, 205.13480017462476, 205.2584958618585, 205.38179809687367, 205.50224126872916, 2…	[71.38189230733721, 71.40457456897354, 71.43179339430837, 71.46205872118179, 71.49469220697046, 71.51446854455637, 71.51619743633826, 71.51719390630196, 71.52475155630108, 71.54071973028503, 71.56236489524147, 71.58615397686322, 71.60841878565712, 71.62973226216984, 71.65062165295691, 71.67191478120574, 71.69368391842997, 71.71610128079243, 71.73958669556153, 71.76404330917751, 71.7893178953102, …	easterly	0.0	0.0	0.0	1.0	0.0
2014-03-30 21:40:00	[203.3175001249012, 203.4196935238749, 203.54435058530092, 203.67657749282387, 203.81507139881944, 203.95421605625447, 204.0884117129002, 204.223608060412, 204.35302689467213, 204.48530504002477, 204.6217937894909, 204.7589907455572, 204.89558330868508, 205.03531126479427, 205.1748302603359, 205.3177398538591, 205.45762065276887, 205.5972104644271, 205.73988368150003, 205.87656348923736, 206.0121…	[71.40564762000676, 71.4366446554202, 71.4583217154753, 71.47318472985688, 71.48452438652527, 71.49419974904984, 71.50586361123453, 71.52225562913297, 71.53929245347268, 71.55245472843214, 71.56311505775776, 71.57447088120236, 71.58678983131713, 71.59749615930969, 71.60450927008289, 71.60732762211376, 71.60764758262808, 71.6085267551695, 71.61375656046192, 71.62521257092394, 71.64205985461862, 71…	easterly	1.0	0.0	0.0	1.0	0.0
2014-03-31 05:50:00	[203.3204566048986, 203.4188271992301, 203.5404395681584, 203.67140612602705, 203.8082176808788, 203.94640393342567, 204.0837803884538, 204.2216068524168, 204.35759037460292, 204.49604932303265, 204.6304062231009, 204.7605663741718, 204.8943023938321, 205.03121186102135, 205.17328039280088, 205.3144451286313, 205.45591176756827, 205.59841063716252, 205.73799212654785, 205.8743163993856, 206.00856…	[71.40386372195911, 71.43596501443321, 71.45893889031494, 71.47509814635933, 71.48535570698012, 71.49272735557949, 71.50132443256463, 71.51332758418147, 71.52553125229565, 71.53729382518763, 71.55166873047555, 71.56846852867034, 71.58287004681004, 71.59393611095607, 71.6007056762325, 71.60255813878445, 71.60225076231339, 71.60427286027998, 71.61193020394882, 71.62467549000975, 71.64061738377116, …	easterly	0.0	0.0	0.0	1.0	0.0
2015-01-14 06:30:00	[203.31373832764552, 203.4108653429581, 203.5271231879153, 203.6509991378003, 203.7716329070147, 203.86373864653584, 203.9598992611565, 204.0583885684472, 204.15102739016191, 204.2540088218251, 204.3884597998025, 204.5110951461639, 204.6240038796965, 204.72368838500304, 204.8176964141505, 204.9300054526508, 205.04452136683116, 205.15613829637869, 205.26094008938452, 205.35918003255475, 205.460164…	[71.39471788554852, 71.42730800770723, 71.45323287792995, 71.47327613556975, 71.49643384388347, 71.53083862252585, 71.5637204661498, 71.59657234645093, 71.631057743589, 71.66198791822028, 71.67780313981837, 71.69916682358637, 71.72561049574637, 71.75773565567658, 71.7904689094476, 71.81776364646034, 71.84520509285471, 71.87385139899712, 71.9042240364018, 71.93678608161157, 71.96874296485876, 71.9…	northerly	1.0	1.0	0.0	0.0	0.0
2015-02-14 13:00:00	[203.41927013105615, 203.55270531087712, 203.6825408735497, 203.8020048281982, 203.896604532971, 203.9736673199112, 204.0550297067004, 204.14458167966723, 204.23125297685016, 204.3120910934958, 204.39281831612243, 204.4790019871753, 204.5869783480758, 204.7050724194736, 204.81829555553028, 204.9278609366371, 205.0323173974142, 205.1171497903973, 205.2155563555622, 205.31434648571968, 205.40556554…	[71.47374483374841, 71.48880702693866, 71.50613416591236, 71.52926688729971, 71.56186325588254, 71.59918233094172, 71.63515977243269, 71.66973211867344, 71.70609834814735, 71.7433283624766, 71.78100651311318, 71.81760290271566, 71.84650611796323, 71.87218745878093, 71.90025924927528, 71.92953264012455, 71.96100847153842, 71.99753415298918, 72.03047043875358, 72.06325565387081, 72.09825301995768, …	westerly	1.0	0.0	0.0	0.0	1.0
2015-04-19 05:50:00	[203.5886898419654, 203.7052913415667, 203.8056946410308, 203.9084816980413, 204.02778762857147, 204.15271361475916, 204.27152215946515, 204.39135357890456, 204.5098954272617, 204.6119519952414, 204.6885407728887, 204.7866435384776, 204.9084067098966, 205.04042062055865, 205.17439395926328, 205.3003920947765, 205.40912645735145, 205.4963764129812, 205.56619198299995, 205.6228597833393, 205.671756…	[71.47592533594027, 71.50100514398746, 71.53291711447979, 71.56328885096997, 71.58654528458743, 71.60756978256657, 71.62961803771375, 71.65327886478653, 71.67838689619131, 71.70907274251901, 71.74706862352424, 71.77860016090725, 71.80215338614155, 71.81939662093055, 71.83630263133028, 71.85783083451511, 71.88712698273514, 71.92284091893207, 71.96196028892508, 72.00299229011566, 72.04535543045264,…	northerly	1.0	1.0	0.0	0.0	0.0
2016-01-23 22:30:00	[203.2076536164737, 203.32198400766984, 203.42146490057164, 203.52866630590893, 203.6533722826905, 203.78489695988, 203.91798611491024, 204.04879391210864, 204.1790956613215, 204.30430408728293, 204.4237778908904, 204.5475688986087, 204.67610225639072, 204.81247611431303, 204.95290897262063, 205.09143783424568, 205.23315390642773, 205.37456209599975, 205.5146457000572, 205.6492310148074, 205.7607…	[71.38353013264398, 71.41069952963534, 71.44271196561807, 71.47105283297105, 71.49223829309018, 71.50833007484786, 71.52327430496626, 71.53948979600467, 71.5568752911913, 71.57723275292942, 71.60011586804765, 71.62272423648224, 71.64168452418532, 71.65389569030944, 71.66099583843535, 71.665949255864, 71.67019699572913, 71.67466318369948, 71.68163690999528, 71.69679989136593, 71.72446245226163, 71…	easterly	1.0	0.0	0.0	1.0	0.0
2016-01-24 06:40:00	[203.12026432952848, 203.23489383443172, 203.34509294666407, 203.45010215918745, 203.5660119367388, 203.69365997716864, 203.82590740614296, 203.96079342216223, 204.0945079411072, 204.2191019770755, 204.34214984239267, 204.46864316859111, 204.5969056849044, 204.73029018269537, 204.8690938815256, 205.01305808924212, 205.1539387578193, 205.2929177889731, 205.43433014020184, 205.57613513407915, 205.7…	[71.35710150995983, 71.38304254754294, 71.41080951740679, 71.44130219785474, 71.46665433832952, 71.48647505218605, 71.50318048201599, 71.51662936388087, 71.53051617662277, 71.54988399429112, 71.57320706545343, 71.59525942800649, 71.61589971008425, 71.63373627484378, 71.64262561418869, 71.6477358744449, 71.65350435372385, 71.66174712922972, 71.67205036971745, 71.68001317608883, 71.68380095979803, …	easterly	0.0	0.0	0.0	1.0	0.0
2016-03-19 06:45:00	[203.3425453444352, 203.4486978971508, 203.56280410574453, 203.68486565317204, 203.8128261179344, 203.9472219629453, 204.0839651587016, 204.22254440838967, 204.3559487305954, 204.48771613148384, 204.62267440597927, 204.75468410204687, 204.88656366003383, 205.0184823096117, 205.14490891563275, 205.2678857091693, 205.391471016968, 205.5140102390848, 205.6371162446289, 205.76394026213097, 205.892391…	[71.41249429784484, 71.44152197510256, 71.46684420438783, 71.48910318308238, 71.50789700672058, 71.5219829604621, 71.53266053918925, 71.54343546018575, 71.55618252631805, 71.5714966885376, 71.58798921122887, 71.60448202193515, 71.62224754105284, 71.64083515784128, 71.6599607702841, 71.68064867242563, 71.70291294766773, 71.72487043988782, 71.74616599373243, 71.76745871496846, 71.78963937403637, 71…	northerly	1.0	1.0	0.0	0.0	0.0
2016-03-20 13:00:00	[203.21930902527453, 203.3408170572599, 203.448137743507, 203.55939368276688, 203.6756436367281, 203.7961469370852, 203.9240499282999, 204.06208690243795, 204.19623087602585, 204.3308018973436, 204.46446079824696, 204.59752137637412, 204.73004265433448, 204.86208023335783, 204.99304586431543, 205.122020780481, 205.24993795994297, 205.37163665397568, 205.4938727805451, 205.61762318264425, 205.7396…	[71.39349347072607, 71.41413701097528, 71.44268471998598, 71.47023711759869, 71.4954827604003, 71.51899528878857, 71.53634995087091, 71.54534981585715, 71.55876342703144, 71.57283255702028, 71.58748526239778, 71.60303256083844, 71.61927988989055, 71.6360756133943, 71.65380064724202, 71.67290051756102, 71.69441233043051, 71.71747846768613, 71.74174193821437, 71.7667480116474, 71.79093327442746, 71…	easterly	0.0	0.0	0.0	1.0	0.0
2016-04-01 06:15:00	[203.3360081490127, 203.43959309443568, 203.5618914642789, 203.63597143593185, 203.6646174297227, 203.69358795416, 203.68962614035055, 203.70987331924212, 203.767486071254, 203.76119140166992, 203.72232221237263, 203.6891415648864, 203.6648063794408, 203.64983932844723, 203.63621661675825, 203.63199090777945, 203.6476469808164, 203.66425384783568, 203.66877657991552, 203.6770708709463, 203.696397…	[71.40900978323036, 71.43928170379074, 71.46112887809568, 71.49812183363072, 71.54264241189459, 71.58584533583769, 71.6307321203177, 71.67582519832227, 71.71618068540064, 71.76074867110489, 71.8034938911142, 71.84650113801298, 71.89123971462192, 71.93596288601536, 71.98042960048774, 72.02482635080173, 72.06922132966032, 72.11377250581859, 72.1584076968619, 72.20272003545823, 72.24785773296318, 72…	westerly	1.0	0.0	0.0	0.0	1.0
2017-02-25 21:50:00	[203.2762405093324, 203.38886442433548, 203.5107848158057, 203.6442981189799, 203.78132791184385, 203.9228366234998, 204.06270009919717, 204.2024166488819, 204.34570466554132, 204.4855713650276, 204.62796137077063, 204.77110823986155, 204.91173554817397, 205.05321464495336, 205.1933259158417, 205.3340968506658, 205.4762579144551, 205.6166391816864, 205.75633444305325, 205.8961784668958, 206.03644…	[71.4033314380028, 71.43125861683248, 71.45451628677796, 71.4697039926256, 71.479855520935, 71.48596772757469, 71.48996744126865, 71.49374930427024, 71.49747421978695, 71.50081415035862, 71.50412062964541, 71.50724415030791, 71.51047064148516, 71.51485600071724, 71.51873949883603, 71.51942375635952, 71.51720681584246, 71.51287106088422, 71.50703637192797, 71.5009693992692, 71.49595506556062, 71.4…	easterly	1.0	0.0	0.0	1.0	0.0
2017-04-21 14:05:00	[203.12134313098707, 203.2617898692092, 203.3974948969549, 203.52857835997224, 203.65627278194395, 203.78300833071668, 203.90960498606728, 204.03387106656652, 204.1419828626258, 204.2244961201553, 204.3451487856804, 204.4838506463352, 204.62565340642405, 204.76704182660657, 204.90855509658437, 205.0507573270956, 205.19297811989065, 205.3347313051113, 205.4764643325896, 205.61769005759407, 205.759…	[71.43638766200475, 71.43733501431161, 71.44632018405926, 71.46330758156071, 71.48269042301125, 71.50225774126426, 71.52199115767749, 71.54343620536609, 71.57104234931388, 71.60785772337681, 71.63070243558022, 71.63906039730931, 71.64196367111262, 71.64197835614146, 71.63966889626428, 71.63643816724966, 71.63240404959076, 71.62780499579556, 71.6235272318476, 71.6212801177436, 71.62302518172856, 7…	southerly	1.0	0.0	1.0	0.0	0.0
2018-02-06 22:25:00	[202.91397773528163, 203.0275267951916, 203.1286045736236, 203.2286503290768, 203.33896238684312, 203.44078959738192, 203.55659115941324, 203.67842808747545, 203.800855824365, 203.91295918502712, 204.04011559722943, 204.1770542943987, 204.31109959384395, 204.44607815201047, 204.58129658936252, 204.71727838001357, 204.85695454596703, 204.99504717837056, 205.1277581859584, 205.26025435593365, 205.3…	[71.28742298391663, 71.31385358449914, 71.34561696592414, 71.37631767584998, 71.4045730134044, 71.43559693707496, 71.46074618694192, 71.48448342487114, 71.50679274324335, 71.53445980207813, 71.5543030564555, 71.56595783717984, 71.57682213188285, 71.59219529122119, 71.60757152908711, 71.61795809391401, 71.62632400450518, 71.63585302262035, 71.65010125213074, 71.6670026775232, 71.68364588636865, 71…	easterly	1.0	0.0	0.0	1.0	0.0
2018-03-22 06:15:00	[203.25770700665865, 203.3564875042395, 203.471647224618, 203.60422482462263, 203.7388194732073, 203.87654007465923, 204.01688529953364, 204.16015849347903, 204.30005916976967, 204.4430375700196, 204.57988582434135, 204.7118479207427, 204.8490512725859, 204.98696185572905, 205.12586651259056, 205.25921267419565, 205.39219932360837, 205.53166420620903, 205.67400287552337, 205.8102071058984, 205.93…	[71.39188134960763, 71.42359955326337, 71.44825543532066, 71.46127127485069, 71.47450602418323, 71.48630799142916, 71.49314248624395, 71.4953973718016, 71.49552519744344, 71.49672669936466, 71.50488144754996, 71.52096430539288, 71.53381543259671, 71.53999758875744, 71.548350844321, 71.56293118809374, 71.57644075946267, 71.58522608153123, 71.5920932557551, 71.60274068698524, 71.62134909819679, 71.…	easterly	1.0	0.0	0.0	1.0	0.0
2018-04-13 12:50:00	[203.0413698458978, 203.15115910349445, 203.26271034215137, 203.37122288076455, 203.48767474321383, 203.6181603620305, 203.75102614413575, 203.87882422748092, 203.9918363759622, 204.09547484987365, 204.18984338481144, 204.27084188595555, 204.34382540311157, 204.47200709553417, 204.6023965626161, 204.7338108387034, 204.86067188889265, 204.96292165143996, 205.0390231302568, 205.1019918477464, 205.1…	[71.35380518470433, 71.38020245651651, 71.40732124391714, 71.4350988564969, 71.45930130374947, 71.47568604411941, 71.49073413235288, 71.51198962622242, 71.53875959071725, 71.57009668716191, 71.6044556095967, 71.6411182522362, 71.67948458836162, 71.69940073907345, 71.71708115595547, 71.734231628786, 71.7552934263552, 71.78586961440016, 71.82394914319755, 71.86478210549123, 71.90501988712644, 71.94…	westerly	1.0	0.0	0.0	0.0	1.0
2018-04-15 14:15:00	[203.3770778105825, 203.49123795428363, 203.61176555309095, 203.7337274830004, 203.8517406442934, 203.9722037257636, 204.1038083973638, 204.2340197350777, 204.35923609035692, 204.47856329327223, 204.58781455475184, 204.6987207985149, 204.82308254202812, 204.9575014683132, 205.09641404124932, 205.2365471222016, 205.3758449067896, 205.51223744941527, 205.6430876877964, 205.76772217922215, 205.88811…	[71.42948013797809, 71.4560461249358, 71.47811806089578, 71.50039831581631, 71.52488520038085, 71.54870612234033, 71.56819354221847, 71.58646481786367, 71.60747883952567, 71.63147911972115, 71.659648840791, 71.68702640882705, 71.70942504183947, 71.724316047153, 71.73496187404437, 71.74408806001514, 71.75404755378139, 71.7674798271166, 71.78573163390612, 71.80778121908402, 71.83212491055625, 71.85…	southerly	0.0	0.0	1.0	0.0	0.0
2018-04-16 13:20:00	[203.1889165526389, 203.30623489042088, 203.4241745343265, 203.53939736382011, 203.6626887135285, 203.78447050303225, 203.90976003065705, 204.0389215425701, 204.16543836556968, 204.296033577365, 204.43199959589631, 204.56765913448692, 204.69749182393636, 204.82459583222249, 204.94675954254896, 205.07171849153497, 205.2025026402557, 205.33888660931456, 205.4777642531438, 205.6150275082128, 205.753…	[71.40924948066949, 71.43427254762493, 71.45954332631155, 71.48281006371504, 71.50516309872145, 71.52638763308354, 71.54833918368952, 71.57023970199081, 71.59029998227214, 71.60874566884983, 71.62329802028796, 71.63662040630251, 71.65289828660545, 71.67359022121069, 71.6959753575632, 71.71645444905454, 71.73465084793943, 71.74978703895081, 71.76309546630856, 71.7756108970492, 71.78614531934878, 7…	easterly	0.0	0.0	0.0	1.0	0.0
2019-01-08 13:00:00	[203.1905806339802, 203.31557300506032, 203.428187110056, 203.5406894461655, 203.65393395039567, 203.7943835759628, 203.937367363322, 204.0792082865252, 204.21799983191275, 204.35779088220127, 204.4961765388645, 204.63398942697933, 204.77007581590183, 204.9078988218545, 205.04483844778653, 205.1800495959692, 205.30667536983955, 205.42149371179323, 205.5324591604467, 205.65945844922223, 205.790302…	[71.38649294830677, 71.40715637626566, 71.43338787997513, 71.46168863466127, 71.48855872121345, 71.49031881114034, 71.49019202598328, 71.49469803699851, 71.50068997983084, 71.50723592630871, 71.5055665210462, 71.49885020918998, 71.50600456760512, 71.51759450083257, 71.52847328613218, 71.54252481292002, 71.5617787348348, 71.5886738406187, 71.61701875401934, 71.63809817760193, 71.65800857996773, 71…	northerly	1.0	1.0	0.0	0.0	0.0
2019-01-09 21:30:00	[203.1865281221076, 203.30214259693776, 203.4139112911622, 203.52826196807095, 203.657620457934, 203.79456998999083, 203.933911690126, 204.0734013141722, 204.2153878436773, 204.35224726199905, 204.47538288458347, 204.5942690197976, 204.7201435070151, 204.8564134508698, 204.9954018156051, 205.13824963578983, 205.2810976389192, 205.42374279521536, 205.55681845249697, 205.6831812891808, 205.80589207…	[71.38283315546151, 71.40828053887046, 71.43513985867901, 71.46119348230455, 71.48015161130716, 71.48944824206808, 71.49445784217687, 71.49723399235208, 71.50029101178859, 71.51111089494839, 71.53274396394895, 71.55619589599904, 71.57593825517642, 71.58750223139425, 71.59093810697013, 71.59209008942074, 71.59443718437136, 71.60158653495331, 71.61638936324294, 71.63666906919887, 71.65929146654575,…	easterly	0.0	0.0	0.0	1.0	0.0
2019-01-11 13:30:00	[203.19184373354005, 203.3278861101536, 203.4577218157881, 203.58634329654265, 203.71787772203885, 203.85225997638688, 203.98760884707488, 204.12227116219944, 204.258029124789, 204.39823595948036, 204.53676162704105, 204.67508302966573, 204.81399991413795, 204.9533664516199, 205.09086457412303, 205.22991029189475, 205.3733365447973, 205.5143728741285, 205.65652521261157, 205.7972921289252, 205.93…	[71.41196537916298, 71.42273133081876, 71.440775331976, 71.4585102309851, 71.47472111392217, 71.48856688907725, 71.50014319446946, 71.51168479826381, 71.52213128719981, 71.52346334092334, 71.51903018479798, 71.51214359937734, 71.50436287151955, 71.49643899581187, 71.48873629063297, 71.48180215354327, 71.47588624854713, 71.47309879183551, 71.47514396163754, 71.4806992623073, 71.48599913145884, 71.…	easterly	0.0	0.0	0.0	1.0	0.0
2019-02-22 05:20:00	[203.26998224173337, 203.3796128526855, 203.4983892923653, 203.62963517883483, 203.76601376674483, 203.9001566351992, 204.03754952088065, 204.1772393151596, 204.3177076067149, 204.45764294461577, 204.59395105619876, 204.72839847083983, 204.86020938428072, 204.99199253400465, 205.11741094840892, 205.2405808133828, 205.35758922395644, 205.47678103691712, 205.5998288375769, 205.72535269016697, 205.8…	[71.40109648922952, 71.43078566128769, 71.45446844890782, 71.47152762736609, 71.48472924137855, 71.49495084341248, 71.50166696734419, 71.50705280844285, 71.51440954428682, 71.52428498487293, 71.53588466111847, 71.55043864212256, 71.56737381438428, 71.58603088657408, 71.60611096142105, 71.62925318448595, 71.65315060502184, 71.67702055039881, 71.69963757756767, 71.72084249935651, 71.74152339486008,…	northerly	1.0	1.0	0.0	0.0	0.0
2019-02-22 14:05:00	[203.29408956915907, 203.41964431092973, 203.5494272652573, 203.68192597596172, 203.81326292840828, 203.95174864217333, 204.09261966075167, 204.2324188787227, 204.36627332485847, 204.4969110866971, 204.6292742829789, 204.76047645394863, 204.8983291135465, 205.03210241689467, 205.16422335646823, 205.28404881402548, 205.39444435230016, 205.5088800260337, 205.63481023085163, 205.76462734770536, 205.…	[71.42186403831612, 71.44319187190403, 71.46084899948369, 71.47865260074184, 71.49459644930957, 71.50480851743708, 71.51048139072968, 71.51810402009856, 71.53079276550899, 71.54770338336718, 71.5659117660178, 71.5816856075553, 71.5947323206744, 71.60747313400259, 71.62501872719412, 71.64857155217416, 71.67530381547084, 71.7013023339251, 71.72402170906378, 71.74430945233658, 71.76512658110828, 71.…	southerly	0.0	0.0	1.0	0.0	0.0
2020-01-02 05:55:00	[203.2966630448074, 203.37983985928045, 203.48318468464527, 203.6234135341849, 203.76583379993215, 203.907788139662, 204.04986210250607, 204.19058395497288, 204.32957672852845, 204.46120191794105, 204.59100928900668, 204.72423967821743, 204.86107489678207, 204.9881962951202, 205.09537922885784, 205.198140100354, 205.3178258642273, 205.4563747572247, 205.59592372996968, 205.7382399760152, 205.8797…	[71.39716168191524, 71.43354964495803, 71.46115806346445, 71.4669049287493, 71.46348672470755, 71.46157174762209, 71.46302457293204, 71.46797201283758, 71.47781864907965, 71.49468798747543, 71.51368800170847, 71.52889734690126, 71.54022076225333, 71.55946590721791, 71.58852748257941, 71.61865939280284, 71.64050211364011, 71.65106478015501, 71.6557413264211, 71.66036594722065, 71.66665007655195, 7…	northerly	1.0	1.0	0.0	0.0	0.0
2020-01-10 21:40:00	[203.2749812946035, 203.3747033974491, 203.46527386056127, 203.550351322228, 203.68196888822487, 203.82503756971383, 203.96586990155257, 204.1059961259484, 204.24198758787315, 204.37061685331443, 204.48358105242545, 204.5914870206907, 204.7047153789754, 204.81717243359455, 204.94312331699592, 205.07472734857143, 205.202942540473, 205.3221672995629, 205.44139098161776, 205.5623881263411, 205.69993…	[71.39009983097638, 71.4224323472667, 71.45666358181029, 71.49140452861229, 71.50549499273096, 71.50507621126167, 71.50490606386077, 71.510568878912, 71.52293271757358, 71.5419758613661, 71.5680195155009, 71.59640633018168, 71.62379135033622, 71.65145278168093, 71.6729578519509, 71.69007902096793, 71.71080615701538, 71.73412528834977, 71.76014343668146, 71.78334546976556, 71.78823147898294, 71.77…	northerly	1.0	1.0	0.0	0.0	0.0
2020-01-29 12:45:00	[203.3860440577514, 203.4890977106864, 203.5997858644512, 203.71298923884387, 203.82397588996864, 203.9153992662208, 203.9802233057015, 204.02972950963428, 204.09175070697864, 204.15660762811805, 204.21656815153605, 204.27770747540563, 204.3500441251842, 204.4249364295033, 204.4861112681876, 204.54189587387305, 204.60748885069685, 204.6921468947646, 204.77964980129312, 204.85127619417835, 204.910…	[71.44606605838206, 71.47682158615733, 71.5050396861397, 71.53068897595419, 71.55867276679417, 71.59272203919537, 71.63196847173113, 71.67384066114462, 71.71499488542901, 71.75485188221236, 71.79609994759309, 71.83748090420279, 71.87679757249067, 71.91513116277272, 71.95615379185988, 71.99774039561842, 72.03714108709882, 72.07454354958823, 72.11062708485244, 72.14956247820948, 72.19184985785989, …	westerly	1.0	0.0	0.0	0.0	1.0
2020-02-06 13:35:00	[203.3339382421023, 203.46496752356464, 203.5964016053854, 203.73348415454848, 203.87165322569592, 204.00805871853507, 204.13623148440345, 204.266283463281, 204.3977155424124, 204.5339420131184, 204.6720610371207, 204.79777808203508, 204.9241588721449, 205.0568395691796, 205.1953047514425, 205.33441499069215, 205.4741625600452, 205.6157996425308, 205.75306518846276, 205.8937454757712, 206.0320002…	[71.43811571097342, 71.45400749810594, 71.46999383670081, 71.48269270440805, 71.48486657883149, 71.47374649822848, 71.4565391239471, 71.4391274303108, 71.4243080232027, 71.41311538412754, 71.41974936055935, 71.43897703723479, 71.45751687197885, 71.47193554696737, 71.4820351044799, 71.48868684698775, 71.49340979782494, 71.49869766908694, 71.50530012925307, 71.51336700786032, 71.52287018705168, 71.…	northerly	1.0	1.0	0.0	0.0	0.0
2020-02-09 14:05:00	[202.65608506158569, 202.745695059448, 202.84312741753655, 202.9505100973733, 203.06078646614927, 203.16127363698604, 203.23939074946617, 203.338762136976, 203.47566519594852, 203.6142450372992, 203.75263258179336, 203.88965001868, 204.02313742237652, 204.1534203606347, 204.27786971345645, 204.39891053334236, 204.51679418581887, 204.63218584451397, 204.71301463475697, 204.77897917732096, 204.8450…	[71.5307965873569, 71.56443096506085, 71.59621985252832, 71.62432246693054, 71.6518946709542, 71.68333254153617, 71.72103425140986, 71.75193399249707, 71.76494717370831, 71.77593701334473, 71.78656461599492, 71.79922788234, 71.81551783952708, 71.8338861355488, 71.85341036450964, 71.87761151174898, 71.90260456673897, 71.92996754412253, 71.96694292066623, 72.00606781948568, 72.04592597615556, 72.08…	northerly	0.0	1.0	0.0	0.0	0.0
2020-02-13 06:30:00	[203.1278010705817, 203.23285207492185, 203.34913871650883, 203.4602172528168, 203.582132312192, 203.7081278160171, 203.8364142675411, 203.96891661190983, 204.10566279797976, 204.2404156046327, 204.3674732631177, 204.49634295277392, 204.62603470059508, 204.74568791812223, 204.85946308302684, 204.97197969229848, 205.0941822961674, 205.2196111824672, 205.35212227762685, 205.4914878878093, 205.62610…	[71.35313247721965, 71.3822353032872, 71.40768708968035, 71.434945816173, 71.45724130509264, 71.47994145127119, 71.49812272900857, 71.51363976400285, 71.52625238099264, 71.53936083488884, 71.55711823944867, 71.57589309310211, 71.59361264551339, 71.61632198863413, 71.64474179391908, 71.67055319637191, 71.69209631362233, 71.71235295994069, 71.7265922444303, 71.73746306732457, 71.74971423247763, 71.…	easterly	1.0	0.0	0.0	1.0	0.0
2020-02-14 22:15:00	[203.05391269119835, 203.17260860795184, 203.28249450485163, 203.3881877397368, 203.5016442283277, 203.62537398546343, 203.75460928555947, 203.8846308765457, 204.01501313826532, 204.14539904332776, 204.2755153984713, 204.39913996492743, 204.52293847946152, 204.6463474692419, 204.76248580090305, 204.88475918252612, 205.0106698059552, 205.13972490306853, 205.2700363195894, 205.4006781573768, 205.52…	[71.3431024891493, 71.36753521101703, 71.39538061413892, 71.42485055312012, 71.45134799101055, 71.47275516477562, 71.49087460878512, 71.50801270540398, 71.52464051023043, 71.54071512510914, 71.55888841605284, 71.58060881546555, 71.6035352935061, 71.62589679856042, 71.6505722324637, 71.67465808643195, 71.69502261661242, 71.71376868994227, 71.73173782826447, 71.75004149088795, 71.76928886000549, 71…	easterly	0.0	0.0	0.0	1.0	0.0
