# Supplementary material for: Atmospheric highs drive asymmetric sea ice drift during lead opening from Point Barrow
Source: Copernicus journal article supplement (doi:10.5194/tc-17-3229-2023), 2023-08-09
Supplement: Supplementary file 1 [file tc-17-3229-2023-supplement.zip › README.txt]

PB_leads_meta.csv
01/23/2023
=================
Descriptions of the 135 identified lead patterns at Point Barrow Jan-Apr 2000-2020. Timing of lead identification, lead coordinates, associated wind direction, and which ensembles of lead events the lead patterns were included in.
=================

date
----
Date and time of lead opening identification from MODIS imagery, in YYYY-MM-DD HH:mm:ss format.

longitude
---------
List of longitudes of Point Barrow lead pattern coordinates along 5 km steps from corresponding date.

latitude
--------
List of latitudes of Point Barrow lead pattern coordinates along 5 km steps from corresponding date.

wind_direction
--------------
Direction from which wind blows during lead opening. From average ERA5 wind vector averaged spatially over the BCS region (70.5-78 latitude and 187-220 longitude) and temporally over 9-hour window around time of lead opening. Either: 'easterly', 'northerly', 'westerly', or 'southerly'.

sequence_ensemble
-----------------
Whether or not lead pattern was included in the 82 events that compose the ensemble average lead opening sequence. 1 indicates inclusion, 0 indicates exclusion.

northerly_ensemble
------------------
Whether or not lead pattern was included in the 40 events that compose the northerly ensemble average lead opening sequence. 1 indicates inclusion, 0 indicates exclusion.

southerly_ensemble
------------------
Whether or not lead pattern was included in the 16 events that compose the southerly ensemble average lead opening sequence. 1 indicates inclusion, 0 indicates exclusion.

easterly_ensemble
-----------------
Whether or not lead pattern was included in the 66 events that compose the easterly ensemble average lead opening sequence. 1 indicates inclusion, 0 indicates exclusion.

westerly_ensemble
------------------
Whether or not lead pattern was included in the 6 events that compose the westerly ensemble average lead opening sequence. 1 indicates inclusion, 0 indicates exclusion.
