# Supplementary material for: Atmospheric highs drive asymmetric sea ice drift during lead opening from Point Barrow
Source: Copernicus journal article supplement (doi:10.5194/tc-17-3229-2023), 2023-08-09
Supplement: Supplementary file 1 [file tc-17-3229-2023-supplement.zip › tc-17-3229-2023-supplement-title-page.pdf]

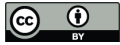

*Supplement of*

## **Atmospheric highs drive asymmetric sea ice drift during lead opening from Point Barrow**

**MacKenzie E. Jewell et al.**

*Correspondence to:* MacKenzie E. Jewell ([jewellm@oregonstate.edu](mailto:jewellm@oregonstate.edu))

- [tc-17-3229-2023-supplement-title-page.pdf](#)
- [PB\\_leads\\_meta.csv](#)
- [README.txt](#)

The copyright of individual parts of the supplement might differ from the article licence.
